1 **Systematic analysis of the R2R3-MYB family of transcription factors in *Camellia sinensis*:**  
2 **evidence for species-specific catechin biosynthesis regulation**

3 Jingyi Li<sup>a,1</sup>, Shaoqun Liu<sup>a,1</sup>, Peifen Chen<sup>a</sup>, Jiarong Cai<sup>a</sup>, Song Tang<sup>a</sup>, Wei Yang<sup>a</sup>, Fanrong Cao<sup>a</sup>, Peng  
4 Zheng<sup>a,\*</sup> and Binmei Sun<sup>a,\*</sup>

5 a. Key Laboratory of Biology and Germplasm Improvement of Horticultural Crops in South China,  
6 Ministry of Agriculture, College of Horticulture, South China Agricultural University, Guangzhou  
7 510642, People's Republic of China

8

9

10

11

12

13

14

15

16

17

18

19

---

\*Corresponding author (P. Zheng and B. Sun) at: Room 603, College of Horticulture, South China  
Agricultural University, Guangzhou 510642, People's Republic of China.

E-mail address: zhengp@scau.edu.cn (P. Zheng), binmei@scau.edu.cn (B. Sun)

1 These authors contributed equally to this work.

## 20 Abstract

21 Tea from *Camellia sinensis* is one of the most popular beverages worldwide, lauded for its  
22 charming flavors and health-promoting properties. *C. sinensis* produces an abundance of specialized  
23 metabolites, which makes it an excellent model for digging into the genetic regulation of plant-  
24 specific metabolite biosynthesis. The most abundant health-promoting metabolites in tea are  
25 galloylated catechins, and the most bioactive of the galloylated catechins, epigallocatechin gallate  
26 (EGCG), is exclusively found in *C. sinensis*. The R2R3-MYB transcription factor family regulates  
27 metabolism of phenylpropanoids, the precursors to catechins, in various plant lineages. However,  
28 the transcriptional regulation of galloylated catechin biosynthesis remains elusive. Species-  
29 expanded or specific MYB transcription factors may regulate species-specific metabolite  
30 biosynthesis. This study mined the R2R3-MYB transcription factors associated with galloylated  
31 catechin biosynthesis in *C. sinensis*. A total of 118 R2R3-MYB proteins, classified into 38  
32 subgroups, were identified. R2R3-MYB subgroups specific to or expanded in *C. sinensis* were  
33 hypothesized to be essential to evolutionary diversification of tea-specific metabolites. Notably, nine  
34 of these *R2R3-MYB* genes were expressed preferentially in apical buds and young leaves, exactly  
35 where galloylated catechins accumulate. Three putative *R2R3-MYB* genes displayed strong  
36 correlation with key galloylated catechin biosynthesis genes, suggesting a role in regulating  
37 biosynthesis of epicatechin gallate (ECG) and EGCG. Overall, this study paves the way to reveal  
38 the transcriptional regulation of galloylated catechins in *C. sinensis*.

39

40 **Keywords:** *Camellia sinensis*, galloylated catechins, R2R3-MYB, transcriptional regulation,  
41 catechin biosynthesis

42

## 43 Introduction

44 Tea from *Camellia sinensis*, along with coffee and cocoa, is one of the world's three major non-  
45 alcoholic beverages. Worldwide, approximately two billion cups of tea are consumed daily (Drew  
46 et al., 2019; Yamashita et al., 2020). Tea production has amplified at an average annual rate of 3.35%

47 in the last five years; by 2019, worldwide tea production reached 6.49 million tons on 5.07 million  
48 hectares (Food and Agriculture Organization of the United Nations statistics,  
49 <https://www.fao.org/faostat/>). Tea was used first as a food in ancient China, then it served as a  
50 medicine to prevent and cure common diseases before developing into a popular beverage (Abbas  
51 et al., 2017; Mondal et al., 2004). Nowadays, tea exhibits great commercial potential and has  
52 become a vital industry due to its health promoting properties and attractive distinct flavors (Chen  
53 et al., 2009).

54 The tea plant (*C. sinensis*) is rich in characteristic metabolites, such as polyphenols, amino acids,  
55 caffeine, and terpenes, that significantly contribute to its pleasant flavors and industrial and medical  
56 value (Wei et al., 2018). Catechins are the principal health-promoting bioactive compounds of tea.  
57 Catechins constitute 12 to 24% of the dry weight of young leaves, and account for more than 70%  
58 of the total polyphenols (Yang et al., 2012). Catechins in tea consist of a mixture of catechin (C),  
59 epicatechin (EC), gallatechin (GC), epigallocatechin (EGC), catechin gallate (CG), epicatechin  
60 gallate (ECG), gallatechin gallate (GCG) and epigallocatechin gallate (EGCG) (Asakawa et al.,  
61 2013). Among them, galloylated catechins ECG and EGCG are abundant in tea plants and account  
62 for more than 80% of total catechins (Kim et al., 2004; Liu et al., 2012). EGCG, exclusively present  
63 in *C. sinensis*, is the major bioactive component conferring the many health benefits of tea - it is  
64 anti-carcinogenic (Ahmad et al., 2000), anti-oxidative (Heim et al., 2002), anti-bacterial and anti-  
65 inflammatory (Taguri et al., 2004) and it prevents cardiovascular and cerebrovascular diseases (Yu  
66 et al., 2020). In addition, EGCG is widely used in food production on account of its strong  
67 antioxidative capacity (Nikoo et al., 2018).

68 To date, based on biochemical, physiological and genetic research, the biosynthesis pathway of  
69 catechins has become clear (Wei et al., 2018; Yang et al., 2012; Yu et al., 2021). Catechins are  
70 derived from the phenylpropanoid pathway and principally accumulate in apical shoots and young  
71 leaves. Galloylated catechin content is mainly regulated at the transcriptional level by catechin  
72 biosynthesis genes *dihydroflavonol reductase (DFR)*, *anthocyanidin reductase (ANR)*,  
73 *leucoanthocyanidin reductase (LAR)* and *serine carboxypeptidase-like acyltransferases (SCPLs)*  
74 (Ashihara et al., 2010; Eungwanichayapant et al., 2009; Punyasiri et al., 2004; Singh et al., 2008;

75 Wei et al., 2018). However, few studies have focused on the network(s) that regulate catechin  
76 biosynthesis, especially galloylated catechins.

77 R2R3-MYB transcription factors (TFs) comprise the largest family of TFs in advanced plants  
78 (Ambawat et al., 2013). In addition to possessing two imperfect MYB repeats (R2 and R3), the  
79 R2R3-MYB TFs maintain a highly conserved N-terminal MYB DNA-binding domain and an  
80 activated or repressed C-terminal domain (Dubos et al., 2010; Jiang et al., 2004; Jin and Martin,  
81 1999; Kranz et al., 1998; Lipsick, 1996; Martin et al., 1997). The R2R3-MYB family is widely  
82 involved in plant growth and development, primary and secondary metabolism, hormone signal  
83 transduction, cellular proliferation and apoptosis, as well as disease and abiotic stress response (Li  
84 et al., 2017; Martin et al., 1997). Notably, the R2R3-MYB family plays an important role in  
85 positively or negatively regulating the biosynthesis of specialized metabolites, such as flavonoids  
86 (Hichri et al., 2011; Mehrtens et al., 2005), anthocyanin (Li et al., 2020; Li et al., 2017; Yu et al.,  
87 2020) and lignin (Bedon et al., 2007; Goicoechea et al., 2005).

88 Studies have found that new R2R3-MYB TFs emerged through species-specific duplication  
89 events (Soler et al., 2015). Species-specific evolved or expanded R2R3-MYB membership seems  
90 to confer functional diversification to organisms (Zhang et al., 2000). For example, the ancestral  
91 R2R3-MYB anthocyanin master regulator expanded into several homologous clusters within the  
92 grape (*Vitis* spp.) and maize (*Zea mays*) genomes, and differential expression of duplicated genes  
93 resulted in control of anthocyanin biosynthesis in different tissues (Jiu et al., 2021; Zhang et al.,  
94 2000). Some species-specific and expanded *R2R3-MYB* TFs govern specialized metabolite  
95 biosynthesis within lineages (Zhu et al., 2019). In *Capsicum*, five Solanaceae-specific MYB TF  
96 tandem genes duplicated in the *Cap1/Pun3* locus. *Capsicum* species have evolved placenta-specific  
97 expression of MYB31, which directly activates expression of capsaicinoid biosynthetic genes and  
98 results in production of genus-specialized metabolites. In *C. sinensis*, only a few R2R3-MYB  
99 transcription factors have a demonstrated role in regulation of phenylpropanoid biosynthesis.  
100 Specifically, *CsANI*, *CsMYB6A* and *CsMYB75* regulate anthocyanin pigments in *C. sinensis* leaf  
101 (He et al., 2018; B. Sun et al., 2016; Wei et al., 2019). However, the *C. sinensis* specific and  
102 expanded R2R3-MYB TFs that are potential candidate regulators of galloylated catechins

103 biosynthesis have still not been identified.

104 In this study, through performing a genome-wide analysis of the R2R3-MYB superfamily in *C.*  
105 *sinensis*, we compared the phylogenetic relationships between *C. sinensis* and other plant lineages.  
106 The gene structure, conserved motifs and transcript patterns were analyzed. Because of the  
107 importance of galloylated catechins in *C. sinensis*, we focused on the discovery of *R2R3-MYB* genes  
108 potentially involved in the regulation of biosynthesis of ECG and EGCG, especially EGCG which  
109 is unique to *C. sinensis*.

110

## 111 **Materials and Methods**

### 112 **Plant materials**

113 The ‘Lingtoudancong’ variety of *C. sinensis* was grown at South Agricultural University in  
114 Guangzhou, China. Apical buds, first leaves, second leaves, mature leaves, old leaves, stems and  
115 roots of ‘Lingtoudancong’ were sampled in spring of 2021. The samples of different tissues were  
116 immediately frozen in liquid nitrogen and stored at -80°C.

### 117 **Phylogenetic analysis**

118 *C. sinensis* MYB protein sequences were retrieved from the Tea Plant Information Archive  
119 database (<http://tpia.teaplant.org/>). In total, 222 MYBs and MYB-related genes were predicted in  
120 the ‘Shuchazao’ genome, but only 118 of these had two consecutive and conserved repeats of the  
121 MYB domain. The R2R3-MYB protein sequences of *Arabidopsis thaliana* were obtained from the  
122 Arabidopsis Information Resource Archive database (<https://www.arabidopsis.org/>). The number of  
123 R2R3-MYB gene models identified by our methodology in the genome of *A. thaliana* (126) was the  
124 same as described in the literature (Dubos et al., 2010). The homologous genes of kiwifruit, coffee,  
125 cacao and grape were retrieved from the Plant Transcription Factor Database ([http://planttfdb.gao-](http://planttfdb.gao-lab.org/)  
126 [lab.org/](http://planttfdb.gao-lab.org/)) by performing a reverse BLAST search. All the R2R3-MYB sequences were aligned using  
127 ClustalX, and a neighbor-joining phylogenetic tree was constructed with 1,000 bootstrap replicates  
128 utilizing MEGAX (Kumar et al., 2016). A pairwise deletion method was chosen to dispose of the

129 positions containing gaps or missing data in the sequences, and the delay divergent cutoff value was  
130 set to 30.

### 131 **Conserved motif analysis of R2R3-MYB**

132 Functional motifs and conserved domains were identified with The MEME Suite tool  
133 (<https://meme-suite.org/meme/>) using the following parameters: site distribution, zero-or-one-site-  
134 per-sequence (ZOOPS) model; maximum number of motifs: 20; minimum motif width: 6;  
135 maximum motif width: 50; minimum number of sites per motif: 2; and maximum number of sites  
136 per motif: 118 (Bailey et al., 2009; Chen et al., 2021). The sequence logos of R2 and R3 repeats of  
137 the R2R3-MYB proteins were based on multiple sequence alignments and were visualized with  
138 WebLogo Version 2.8.2 (<http://weblogo.berkeley.edu/logo.cgi>). All obtained motifs were  
139 constructed and visualized using the Gene Structure View (Advanced) of the TBtools software  
140 (Chen et al., 2020).

### 141 **RNA-seq expression analysis**

142 The RNA-seq data were downloaded from TPIA for transcript abundance analyses. The  
143 expression levels of the candidate *R2R3-MYB* TFs and catechin biosynthesis genes from different  
144 tissues of *C. sinensis* were used to generate a heatmap with TBtools software using the normalized  
145 method.

### 146 **RNA extraction and quantitative real-time PCR (qRT-PCR)**

147 Total RNA of different tissues of ‘Lingtoudancong’ was extracted utilizing a Magen HiPure Plant  
148 RNA Mini kit B (R4151, Magen, China) according the manufacturer’s instructions. First-strand  
149 cDNA was synthesized using a HiScript III RT 1<sup>st</sup> Strand cDNA Synthesis kit (R323-01, Vazyme,  
150 China) in a reaction volume of 20  $\mu$ L. qRT-PCR was performed in a Bio-Rad CFX384 Touch<sup>TM</sup>  
151 system. Each 10  $\mu$ L reaction mixture was comprised of 4.4  $\mu$ L qPCR SYBR Green Master Mix  
152 (Yeasen, China), 4.4  $\mu$ L double distilled water, 0.2  $\mu$ L of each primer (10  $\mu$ mol/ $\mu$ L) and 1  $\mu$ L of  
153 cDNA template. The reaction program was as follows: 95  $^{\circ}$ C for 5 min; then 39 cycles at 95  $^{\circ}$ C for  
154 5 s and 60  $^{\circ}$ C for 30 s. A melting-curve analysis was carried out at 95  $^{\circ}$ C for 5 s, which was followed  
155 by a temperature increase from 60  $^{\circ}$ C to 95  $^{\circ}$ C. *Actin* (*TEA019484.1*) was used as the housekeeping

156 gene. The relative expression of each gene was calculated with the  $2^{-\Delta\Delta Ct}$  method (Livak and  
157 Schmittgen, 2001). The qRT-PCR primers were designed with the qPrimerDB-qPCR Primer  
158 Database (<https://biodb.swu.edu.cn/qprimerdb/>). Sequences of the primers are listed in  
159 Supplementary Table S2. Values were the means  $\pm$  SDs of 3 replicates.

#### 160 **Quantification of catechin contents**

161 Reference standards of catechin (C), epicatechin (EC), epigallocatechin (EGC), epicatechin  
162 gallate (ECG), and epigallocatechin gallate (EGCG) were purchased from Shanghai Yuanye Bio-  
163 Technology Co., Ltd. (Shanghai, China). Apical buds, first leaves, second leaves, mature leaves, old  
164 leaves, stems and roots of ‘Lingtoudancong’ were ground into fine powders and freeze-dried.  
165 Approximately 0.2 g of each sample powder was extracted with 8 mL of 70% methyl alcohol  
166 (diluted with ultrapure water). After ultrasonic extraction for 30 min, the supernatant was collected  
167 by centrifugation. 1 mL of the liquid supernatant was filtered through a 0.22  $\mu$ m Millipore  
168 membrane. The extracts were injected into an XSelect HSS C18 SB column (4.6  $\times$  250 mm, 5  $\mu$ m,  
169 Waters Technologies, USA). The catechin monomers were separated using 0.1% aqueous formic  
170 acid (A) and 100% acetonitrile (B) as mobile phases on a Waters Alliance Series HPLC system  
171 (Waters Technologies, USA). Detection was performed at 280 nm. Data were presented as the mean  
172  $\pm$  SD (n = 3).

#### 173 **Correlation analysis of gene expression and metabolite accumulation**

174 The correlation analysis among transcription factors, catechin biosynthesis genes and catechin  
175 monomer contents was performed via Pearson’s correlation coefficients. The R software was  
176 adopted to visualize the relationship directly. A correlation coefficient of  $>0.5$  was considered to be  
177 a positively associated pair, and  $R < -0.5$  was thought of as a negative correlation. In the diagram,  
178 blue represents a positive correlation, and red represents a negative correlation.

179

#### 180 **Results**

#### 181 **Comparative phylogenetic analysis of the R2R3-MYB families in *C. sinensis* and *A. thaliana***

182 A total of 118 *R2R3-MYB* genes were identified in the *C. sinensis* genome after manual curation  
183 and exclusion of alternative transcripts. All identified *R2R3-MYB* genes from *C. sinensis* (118) were  
184 aligned with those of *A. thaliana* (126), and their evolutionary history was inferred by constructing  
185 a neighbor-joining phylogenetic tree (Fig.1). The 118 *R2R3-MYB* genes of *C. sinensis* were named  
186 in light of the systematic naming rules of *A. thaliana*, except for *CsMYB1*, *CsMYB4a* and *CsAN1*,  
187 which had been functionally characterized previously (Li et al., 2017; Sun et al., 2016a; Yang et al.,  
188 2012) (Supplementary Table S1). In addition, as it is believed that genes which clustered together  
189 were considered to be in the same subgroup, and *A. thaliana* is, by far, the species for which the  
190 *R2R3-MYB* genes have been most extensively investigated, the 38 subgroups were classified by  
191 taking into account the topology of the tree and the bootstrap values (Fig. 1) and were named  
192 according to the classification of *A. thaliana* (Dubos et al., 2010). For new subgroups not previously  
193 proposed in *A. thaliana*, the subgroup was named after the known functionally characterized *A.*  
194 *thaliana* member.

195 The majority of subgroups contained members from both species. However, S12 was an  
196 *Arabidopsis*-specific subgroup, containing only *R2R3-MYB* members from *A. thaliana*. The  
197 members of subgroup S12, *AtMYB28*, *AtMYB29*, *AtMYB76*, *AtMYB34* and *AtMYB51* regulate  
198 glucosinolate biosynthesis, a metabolite exclusive to the *Brassicaceae* family (Gigolashvili et al.,  
199 2007; Matus et al., 2008). In contrast, three subgroups contained *R2R3-MYB* TFs that were present  
200 only in *C. sinensis* without any homologues in *A. thaliana*. Therefore, their names we designated as  
201 Tea Preferential Subgroup A (TPSA), Tea Preferential Subgroup B (TPSB) and Tea Preferential  
202 Subgroup C (TPSC). Remarkably, SMYB5 and S5 subgroups were comprised of more tea plant  
203 *R2R3-MYB* members than *A. thaliana* members. For example, subgroup S5 had three *C. sinensis*  
204 members (*CsMYB31*, *CsMYB32* and *CsMYB34*), while *A. thaliana* contributed only one member,  
205 *AtMYB123/TT2*. Similarly, the SMYB5 subgroup had four members from *C. sinensis* (*CsMYB37*,  
206 *CsMYB39*, *CsMYB42* and *CsMYB43*), but just one member (*AtMYB5*) from *A. thaliana*. In  
207 *Arabidopsis*, the members of SMYB5 and S5 subgroups are involved in the phenylpropanoid  
208 pathway. *AtMYB123* controls the biosynthesis of proanthocyanidins (PAs) in the seed coat and  
209 *AtMYB5* was partially redundant with *AtMYB123* (Gonzalez et al., 2009). The expansion of SMYB5



210 and S5 subgroups in *C. sinensis* suggests that diversified regulation of polyphenols emerged during  
211 the speciation of *C. sinensis*.

212 Overall, the phylogenetic analysis results highlighted five special subgroups TPSA, TPSB, TPSC,  
213 S5 and SMYB5, which expanded in or were exclusively present in *C. sinensis*. Among these  
214 subgroups, a total of 21 *R2R3-MYB* TFs (TPSA (6), TPSB (4), TPSC (4), S5 (3) and SMYB5 (4))  
215 attracted our attention and were selected for further analysis as potential candidates involved  
216 metabolic processes specific to *C. sinensis*.

### 217 **Functions inferred through phylogenetic analysis of the candidate subgroups in six plant** 218 **species**

219 To evaluate the 21 *R2R3-MYB* genes of the five tea-specific and tea-expanded subgroups TPSA,  
220 TPSB, TPSC, S5 and SMYB5, the homologous *R2R3-MYB* genes from kiwifruit, coffee, cacao, and  
221 grape were used to construct phylogenetic tree (Fig. 2). The number of *R2R3-MYB* TFs presented a  
222 trend of expansion in *C. sinensis* (21) similar to coffee (20), but greater than cocoa (11), kiwifruit  
223 (11) and grape (18). We surmised that the *C. sinensis* expanded *R2R3-MYB* function may have  
224 occurred through divergent evolution during speciation. For example, subgroup TPSA was  
225 expanded in tea (6) relative to coffee (3), cocoa (5), kiwifruit (5) and grape (1). In the TPSB  
226 subgroup, coffee (4), grape (4) and kiwifruit (3) had comparable numbers of members with *C.*  
227 *sinensis* (4), but only two homologous genes were found in cocoa. Subgroup TPSC contained  
228 homologous genes in all species except for kiwifruit. Remarkably, no isogenous genes of TPSA,  
229 TPSB or TPSC subgroups were present in *A. thaliana*, indicating that these *R2R3-MYBs* evolved  
230 only in tea plant and probably have novel functions.

231 To uncover the roles these *R2R3-MYB* genes serve, we searched for the functional characteristics  
232 of the selected *R2R3-MYB* genes from four close relative species. Only a few homologous genes  
233 (*GSVIVT01026868001*, *Achn38246* and *Achn172901* from the TPSA subgroup; *Achn143561*,  
234 *Achn322351* and *GSVIVT0103866001* from the TPSB subgroup; and *Thecc1EG029126t1*,  
235 *GSVIVT01016765001* and *GSVIVT01035467001* from TPSC subgroup) have been experimentally  
236 verified. In the TPSA subgroup, *GSVIVT01026868001* played an inhibitory role in flower

237 development (Velasco et al., 2007), while both *Achn38246* and *Achn172901* acted as transcriptional  
238 activators involved in cold stress response (Park et al., 2010; Savage et al., 2013). Homologous  
239 genes in the TPSB subgroup, *Achn143561*, *Achn322351* and *GSVIVT0103866001*, performed a  
240 similar role in regulating plant protection against UV stress (Schenke et al., 2014). The paralogous  
241 genes of subgroup TPSC (*Thecc1EG029126t1*, *GSVIVT01016765001* and *GSVIVT01035467001*)  
242 mainly regulated plant epidermal cell fate (Cheng et al., 2014; Savage et al., 2013). Above all, we  
243 ventured that the function of the TPSA, TPSB and TPSC subgroups in *C. sinensis* might associate  
244 with responses to biotic and abiotic stress along with influencing certain developmental processes.

#### 245 **Conserved motif analysis of R2R3-MYBs**

246 The R2 and R3 MYB domains of the 118 *C. sinensis* R2R3-MYB TFs were analyzed (Fig.3). The  
247 R2 and R3 domains contain a set of characteristic amino acids, which include the highly conserved  
248 and evenly distributed tryptophan residues (Trp, W) known to be critical for sequence-specific  
249 binding of DNA (Cao et al., 2013; Stracke et al., 2001), demonstrating that the R2 and R3 MYB  
250 repeats of the MYB DNA-binding domain are highly conserved in *C. sinensis*, consistent with  
251 previous findings of the counterpart genes in other plant lineages (Du et al., 2012; Li et al., 2016;  
252 Wilkins et al., 2009). Most of the conserved residues were situated between the second and third  
253 conserved W residues in each MYB repeat, elucidating that the first area of them was less conserved  
254 than the other two.

255 Conserved amino acid motifs represent functional areas that are maintained during evolution. The  
256 conserved motifs within the 118 R2R3-MYB sequences were analyzed and aligned using MEME  
257 Suite (Bailey et al., 2009). A total of 20 conserved motifs were identified in the R2R3-MYB family  
258 (Fig. 4). Six of these, motifs 1 to 6, were present in all R2R3-MYB members except for CsMYB1a  
259 and thus were designated as “general motifs;” the rest of the motifs (motifs 7 to 20) were considered  
260 to be “specific motifs,” since they were present in only one or several R2R3-MYB members. For  
261 instance, motifs 16 and 9 were unique to CsMYB1a and CsMYB117a; meanwhile, motifs 15 and  
262 19 were contained only in three genes. Overall, the members clustering to the same clade harbored  
263 similar motif patterns.

## 264 **Expression patterns of the *R2R3-MYB* family**

265 The expression patterns of 118 genes encoding *R2R3-MYB* TFs were analyzed in different tissues.  
266 No transcripts were detected for *CsMYB101* (*TEA028392.1*) and *CsMYB117b* (*TEA002233.1*),  
267 suggesting they are pseudogenes in *C. sinensis*. The genes were classified into seven expression  
268 clusters, based on their distinct transcript patterns in various tissues and organs (Fig. 5). The 21  
269 genes in RNA-seq-based cluster 1 were expressed mainly in flowers; genes in cluster 2 (14) were  
270 predominantly expressed in fruits; genes in cluster 3 (29) were mainly expressed in tender roots;  
271 genes in cluster 4 (8) were expressed at comparable levels in both apical buds and tender roots;  
272 cluster 5 genes (18) were mainly present in apical shoots and young leaves; while cluster 6 genes  
273 (21) were mainly expressed in stems and finally, cluster 7 genes (5) were equally expressed in  
274 mature leaves, old leaves and stems. Normally, genes within the same phylogenetic subgroup exhibit  
275 distinct transcript profiles (Dubos et al., 2010). Such was the case for subgroup S14: the members  
276 in this subgroup were detected in RNA-seq-based clusters 1, 3 and 6. In *A. thaliana*, members of  
277 S14 were generally related to axillary bud formation and cell differentiation. In some cases, however,  
278 genes belonging to the same subgroups might also have similar transcription profiles in the same  
279 tissue, organ or cell type. Such was the case with the TPSA subgroup; all were present in RNA-seq-  
280 based cluster 3. Likewise, all members of subgroup S5 gathered in cluster 5.

281 Previous reports have pointed out that most of the genes involved in flavonoid formation and  
282 catechin biosynthesis were preferentially expressed in apical buds and young leaves, where most  
283 galloylated catechins accumulate (Wei et al., 2018). Accordingly, *R2R3-MYBs* in RNA-seq-based  
284 cluster 5, whose expression level was highest in these two tender tissues, are the most likely  
285 candidates regulating catechin biosynthesis. As is shown in Fig. 5, almost half of the genes found in  
286 cluster 5 (9) belonged to the subgroups that specifically evolved in or expanded in *C. sinensis*,  
287 subgroups S5, SMYB5, TPSB and TPSC. It is worth noting that genes of subgroup S5 and SMYB5  
288 were confirmed to be involved in flavonoid formation in *A. thaliana* (Nesi et al., 2001; Stracke et  
289 al., 2001), whereas subgroup TPSB was inferred to be relevant to UV protection and subgroup TPSC  
290 to control plant epidermal cell fate specification.

## 291 ***In silico* analysis of *R2R3-MYB* expression and catechin accumulation**

292 Catechins are the major type of polyphenols, comprising up to 70% of the polyphenols in the tea  
293 plant. Fig 6B shows that catechin contents, especially the contents of the galloylated catechins  
294 EGCG and ECG, are significantly higher in apical buds and young leaves than in other tissues.  
295 Therefore, for understanding the possible correlation between the galloylated catechins and the  
296 *CsR2R3-MYBs* that specifically evolved or expanded in *C. sinensis*, we focused on the nine *R2R3-*  
297 *MYBs* grouped in cluster 5 (*CsMYB22*, *CsMYB29*, *CsMYB30*, *CsMYB31*, *CsMYB32*, *CsMYB34*,  
298 *CsMYB37*, *CsMYB39* and *CsMYB42*) because they were preferentially expressed in apical buds and  
299 young leaves.

300 Further, the transcript abundance of the nine potential *R2R3-MYB* TFs and the catechin  
301 biosynthesis genes were investigated in different tissues. The results clearly showed that the genes  
302 in the catechin biosynthesis pathway display tissue-specific expression patterns. The genes  
303 downstream of catechin biosynthesis (*CsSCPLIA7*, *CsANR*, *CsLAR*, *CsDFR*, *CsFLS*, *CsF3H*,  
304 *CsF3'5'H*) were highly expressed in apical buds and young leaves, whereas the upstream genes  
305 (*CsPAL*, *Cs4CL*, *CsC4H*) were highly expressed in root and flower (Fig. 6C). Interestingly, the nine  
306 candidate *R2R3-MYB* TFs showed preferential expression in apical buds and young leaves, which  
307 was consistent with the expression pattern of the downstream catechin biosynthetic genes, indicating  
308 that those *R2R3-MYBs* have relevance to catechin biosynthesis.

309 To identify the relationship between transcript abundance and catechin contents, a comprehensive  
310 gene-to-metabolite correlation analysis was conducted. As shown in Fig. 6D, the three genes in the  
311 catechin biosynthesis pathway (*CsPAL*, *CsC4H* and *Cs4CL*) that were not tender parts-specific  
312 indeed showed a low correlation or negatively correlated to catechin content. Comparatively, the  
313 expression level of the nine candidate *R2R3-MYB* TFs was positively correlated to the transcript  
314 abundance patterns of the catechin biosynthesis pathway downstream genes (*CsSCPLIA7*, *CsANR*,  
315 *CsLAR*, *CsDFR*, *CsFLS*, *CsF3H*, *CsF3'5'H*) and correlated with the contents of EGCG and ECG,  
316 with inter-gene-to-metabolite Pearson's correlation coefficients over 0.55. *CsMYB30*, *CsMYB34*,  
317 *CsMYB37* and *CsMYB42* exhibited good performance compared with the others, each having a  
318 correlation coefficient exceeding 0.75, indicating an extremely strong correlation. Notably,  
319 *CsMYB34* had the strongest correlation with the catechin biosynthesis pathway downstream genes

320 (>0.9), especially with *CsSCPLIA7* (0.99). Besides that, the coefficients between *CsMYB34* and  
321 EGCG and ECG contents were 0.89 and 0.86, respectively.

### 322 **Validation of the correlation between *R2R3-MYB* TFs and catechins**

323 To validate the relationship between *R2R3-MYB* TFs and catechins, HPLC and qRT-PCR assays  
324 were carried out. Different tissues of the tea plant were tested for the contents of different catechin  
325 monomers via HPLC (Fig.7A). As shown in Fig.7A, there was a high level of EGCG in all tested  
326 tissues compared with the other catechin monomers, reaching the highest level in apical buds (AB)  
327 and young leaves (FL and SL). Additionally, the expression patterns of the nine specially evolved  
328 and expanded candidate *CsR2R3-MYBs* and catechin biosynthesis genes in different tissues were  
329 verified by qRT-PCR. According to the relative expression patterns, there were four distinct clusters  
330 (cluster A-D) (Fig. 7B). The genes upstream of catechin biosynthesis (*CsPAL*, *CsC4H*, *Cs4CL*)  
331 grouped in cluster A and were highly expressed in roots, consistent with the absence of catechins in  
332 roots (Fig. 6C). *CsMYB22*, *CsMYB31* and *CsMYB42* (cluster B) had distinctly high expression in  
333 old leaves, and were not apical bud- or young leaf-specific. Remarkably, *CsMYB30*, *CsMYB32*,  
334 *CsMYB34* and *CsMYB37*, which clustered with critical genes downstream of catechins biosynthesis  
335 (cluster D) were highly expressed in apical buds and first leaves, where EGCG and ECG  
336 accumulated (Fig. 7A), preliminarily validating the intimate correlation between *CsMYB30*,  
337 *CsMYB32*, *CsMYB34*, *CsMYB37* and catechin biosynthesis.

338 For further confirmation, gene-to-metabolite correlation analysis of *CsMYB30*, *CsMYB32*,  
339 *CsMYB34*, *CsMYB37*, key genes of the catechin biosynthesis pathway, and the accumulation of  
340 catechins was conducted (Fig.7C). The results confirmed the extremely low correlation between  
341 four of the candidate TFs and the genes upstream of catechin biosynthesis *CsPAL*, *CsC4H* and  
342 *Cs4CL*. In contrast, *CsMYB30*, *CsMYB34* and *CsMYB37* were strongly associated with most of the  
343 major genes downstream of the galloylated catechin biosynthesis pathway (*CsSCPLIA7*, *CsANR*,  
344 *CsLAR* and *CsDFR*) as well as ECG and EGCG contents (> 0.7). Particularly, *CsMYB37* showed  
345 the highest correlation level with the highest inter-correlation coefficients within the four major  
346 functional genes *CsSCPLIA7*, *CsANR*, *CsLAR*, *CsDFR* and the contents of EGCG and ECG  
347 reaching to 0.79, 0.78, 0.88, 0.85, 0.87 and 0.8, respectively. However, *CsMYB30*, *CsMYB34* and

348 *CsMYB37* were less related to the other downstream catechin biosynthesis genes (*CsFLS*, *CsF3H*,  
349 *CsF3'5'H*) according to their lower Pearson's correlation coefficients. Consistent with the *in silico*  
350 results in Fig. 6D, the correlation among *CsMYB32*, the galloylated catechin contents and the  
351 biosynthesis genes was weaker than the other three *R2R3-MYBs*. In more detail, it had a relatively  
352 low correlation coefficient with ECG (0.52) and EGCG (0.67), and a relatively low correlation  
353 coefficient with genes *CsSCPLIA*, *CsANR*, *CsLAR* and *CsDFR* (0.5, 0.36, 0.74 and 0.37,  
354 respectively).

355 The results provide convincing clues that *CsMYB30*, *CsMYB34*, *CsMYB37* might be the key  
356 transcription factors regulating galloylated catechins biosynthesis for the *Camellia*-specific  
357 specialized metabolites ECG and EGCG.

358

## 359 Discussion

360 Plants are rich in metabolites that allow them to adapt to the environment and resist biotic and  
361 abiotic stress (Howe and Jander, 2008). These metabolites are widely used as natural products for  
362 treating human diseases and are valuable raw materials for modern industry (Guo et al., 2018; Fang  
363 et al., 2019; Howe et al., 2008; Plomion et al., 2001). *C. sinensis* is an advantageous model system  
364 to dig into plant-specific metabolite biosynthesis and genetic regulation. Its metabolites, such as  
365 flavonoids, caffeine, and volatile terpenes, accumulate in abundance and share characteristics with  
366 the same metabolites in other plant lineages (Yu et al., 2020).

367 Galloylated catechins are secondary metabolites only found in *Vitis vinifera* and *C. sinensis* (Wei  
368 et al., 2018). Contrary to the small amount of galloylated catechins present in the form of ECG in  
369 *Vitis vinifera* (Bontpart et al., 2018), they are abundant in *C. sinensis*, and EGCG, only existing in  
370 tea plants, is the predominant form (Kim et al., 2004; Steinmann et al., 2013). It is the most bioactive  
371 component among the catechin enantiomers, and is derived from the flavonoid branch of the  
372 phenylpropanoid metabolite pathway. The acyltransferase family, belonging to subclade 1A of  
373 serine carboxypeptidase-like (SCPL) acyltransferases, acts as the most critical downstream gene  
374 family involved in the production of EGCG and ECG (Wei et al., 2018). This family extensively

375 expanded to 22 members in the *C. sinensis* genome, while the *Vitis vinifera* genome contains half  
376 that number (11) (Wei et al., 2018). Two key enzymes Epicatechin:1-O-galloyl-b-D-glucose O-  
377 galloyltransferase (ECGT) and UDP-glucose: galloyl-1-O-b-D-glucosyltransferase (UGGT) are  
378 recruited to catalyze the last two reactions in this bioprocess (Liu et al., 2012). The biosynthesis of  
379 galloylated catechins in *C. sinensis* has been comprehensively investigated with regard to the  
380 biosynthesis genes of the pathway. However, the transcriptional regulation of these pathways  
381 remains to be illuminated.

382 Genes responsible for plant secondary metabolite biosynthesis are coordinately regulated by TFs,  
383 a regulatory superfamily that dynamically drives the evolution of plant metabolic pathways for  
384 special compounds (Shoji et al., 2021). The regulatory network of this gene superfamily is highly  
385 conserved both in angiosperms and gymnosperms (Zhang et al., 2014). The *R2R3-MYB* TFs confer  
386 tissue-specific or development stage-specific patterns for metabolites in the same biosynthesis  
387 pathway; often, multiple paralogues coexist in one species (Zhang et al., 2014). Lignin, flavonoids,  
388 anthocyanins and capsaicinoids are four different types of secondary metabolites synthesized from  
389 the phenylpropanoid pathway that are regulated by *R2R3-MYB* TFs (Sun et al., 2016; Zhu et al.,  
390 2019; Soler et al., 2015). Remarkably, the great expansion of this transcription-regulatory  
391 superfamily in plant lineages appears to account for the diversity of regulatory functions that the  
392 *R2R3-MYB* TFs undertake in plant-specific metabolic bioprocesses (Millard et al., 2019). As  
393 demonstrated in detail by the analysis of Soler et.al, the *R2R3-MYB* subgroups in *E. grandis*, *V.*  
394 *vinifera* and *P. trichocarpa*, which were equipped with expanded members, greatly determined the  
395 diversification of specific functions in lignin biosynthesis (Soler et al., 2015).

396 Based on the consideration of the unique and abundant accumulation of the specific galloylated  
397 catechins (ECG and EGCG) in tea plant and tea-specific *R2R3-MYB* TFs identified in this work, we  
398 hypothesize that the biosynthesis of the characteristic galloylated catechins is absolutely influenced  
399 at the transcription regulation level. Different from the result that concentrates on the involvement  
400 of some *CsR2R3-MYB* genes in response to drought, cold, gibberellic acid (GA), and abscisic acid  
401 (ABA) treatments, which are revealed in the recent genome-wide report of this family (Chen et al.,  
402 2021), we firstly emphasize on confirming the putative *R2R3-MYB* candidates that directly function

403 in the production of *Camellia*-specialized compounds (EGCG) among the tea-specific *R2R3-MYB*  
404 transcription factors.

405 The comprehensive and comparative phylogenetic analysis of *CsR2R3-MYB* TFs, backed by  
406 multiple sequence alignment among *C. sinensis* and *A. thaliana*, suggests that most of the members  
407 in this family are conserved. Most *R2R3-MYBs* share similar functions to the homologous  
408 counterparts studied in *A. thaliana*. Some of the *R2R3-MYB* TFs that clustered in TPSA, TPSB and  
409 TPSC subgroups evolved exclusively in *C. sinensis*, but have isogenous genes in *Actinidia chinensis*,  
410 *Vitis vinifera*, *Theobroma cacao* and *Coffea canephora* genomes. Thus, we speculated that TPSA,  
411 TPSB and TPSC are either obtained in *C. sinensis* or lost in *A. thaliana* lineages after divergence  
412 from their most recent common ancestor during two whole-genome duplication (WGD) events. In  
413 addition, members of SMYB5 and S5 subgroups, regulating flavonoids biosynthesis in *A. thaliana*,  
414 are greatly expanded in *C. sinensis*, which suggests that they might be either functionally redundant  
415 genes or genes that undertake some novel functions in the tea plant.

416 Considering that characteristic catechins highly accumulate in apical buds and young leaves, we  
417 speculated that the *CsR2R3-MYB* TFs that are preferentially expressed in these tender tissues along  
418 with the major catechin-biosynthesis genes are the most promising candidates putatively regulating  
419 the biosynthesis of tea-specific catechins. Consistent with previous results (Wei et al., 2018), our  
420 study observed high expression levels of key galloylated catechin biosynthesis genes *SCPLIA*, *ANR*,  
421 *LAR* and *DFR* in tender tissues, while the expression of upstream genes (*PAL*, *C4H*, *4CL*) in the  
422 phenylpropanoid pathway that are mainly relevant to the generation of condensed polymer  
423 proanthocyanidins (PAs), was in fruits, flowers and roots. However, *CsMYB42* was preferentially  
424 expressed in tender tissues and had a strong correlation with catechin biosynthesis genes and the  
425 contents of ECG and EGCG in the ‘Shuchazao’ variety (Fig. 6D), while it was preferentially  
426 expressed in old leaves in the ‘Lingtoudancong’ variety (Fig. 7C). Thus, differences can be observed  
427 in different *C. sinensis* varieties. Eventually, through systematic analyses, *CsMYB30* (TPSC  
428 subgroup), *CsMYB34* (S5 subgroup) and *CsMYB37* (SMYB5 subgroup) were confirmed as the  
429 potential *R2R3-MYB* TFs relevant to the internal accumulation of characteristic catechins (ECG and  
430 EGCG) in *C. sinensis*, however, further investigation is needed. This study laid a theoretical



431 framework and valuable foundation for the needed future work, as we have provided a considerable  
432 amount of preliminarily evidence through systematic bioinformatics analysis to gain a deeper  
433 perception of the functional roles of the R2R3-MYB superfamily in *C. sinensis*. Nevertheless, it is  
434 still necessary to further exploration and validate these results.

435

## 436 **Conclusions**

437 A total of 118 *R2R3-MYB* gene members, classified into 38 subgroups, were identified in the *C.*  
438 *sinensis* genome. Notably, five subgroups (TPSA, TPSB, TPSC, S5 and SMYB5) containing 21  
439 *R2R3-MYB* TFs were identified to be remarkably expanded in or completely unique to *C. sinensis*.  
440 Furthermore, gene structure predictions, expression profile validation and correlation analyses were  
441 subsequently conducted to screen out the most promising candidate *R2R3-MYB* TFs (*CsMYB30*,  
442 *CsMYB34* and *CsMYB37*) that positively function in galloylated catechin biosynthesis in tea plants.  
443 The present findings underpin a basic understanding of species-specific regulatory mechanisms that  
444 *C. sinensis* employs to biosynthesize specialized metabolites and will be beneficial for selecting  
445 favorable *C. sinensis* germplasms.

446

## 447 **Abbreviation**

448 C, catechin; EC, epicatechin; GC, gallatechin; EGC, epigallocatechin; CG, catechin gallate; ECG,  
449 epigallocatechin gallate; GCG, gallatechin gallate; EGCG, epigallocatechin gallate; qRT-PCR,  
450 Quantitative reverse transcription polymerase chain reaction; PAL, Phenylalanine ammonia lyase;  
451 C4H, Cinnamate 4-hydroxylase; 4CL, 4-Coumarate: coenzyme A ligase; CHS, Chalcone synthase;  
452 CHI, Chalcone isomerase; F3H, Flavanone -3-hydroxylase; F3'H, Flavonoid 3'-hydroxylase;  
453 F3'5'H, Flavonoid 3'5'-hydroxylase; FLS, Flavonol synthase; DFR, Dihydroflavonol 4-reductase;  
454 ANS, Anthocyanidin synthase; ANR, Anthocyanidin reductase; LAR, Leucoanthocyanidin 4-  
455 reductase; SCPL1A, Subelade 1A of serine carboxypeptidase-like acyltransferases; TFs,  
456 transcription factors; HPLC, high-performance liquid chromatography; Trp/W, tryptophan.

457

458 **Data availability statement**

459 The original contributions presented in the study are included in the article/Supplementary Material,  
460 further inquiries can be directed to the corresponding author/s.

461

462 **Authors' contributions**

463 J.L. performed the qRT-PCR test, analyzed the data, made the data charts and wrote the manuscript.  
464 S.L. conceived the project and supervised the researches. P.C. carried out the HPLC test. J.C., S.T.  
465 and W.Y collected the materials for the experiments and provided useful suggestions. F.C. reviewed  
466 and edited the manuscript. P.Z funded the researches and reviewed the manuscript. B.S. designed  
467 the project, supervised the researches, interpreted data and edited the manuscript.

468

469 **Conflicts of interest**

470 The authors declare that they have no conflicts of interest with the contents of this article.

471

472 **Funding**

473 This work was supported by the Natural Science Foundation of Guangdong Province  
474 (2021A1515012091) and the Science and Technology Projects of Guangzhou ( 202102020290).

475

476 **Appendix A. Supplementary data**

477

478 **References**

479 Abbas, M., Saeed, F., Anjum, F.M., Afzaal, M., Tufail, T., Bashir, M.S., Ishtiaq, A., Hussain, S.,  
480 Suleria, H.A.R., 2017. Natural polyphenols: An overview. *Int. J. Food Prop.* 20, 1689–1699.  
481 <https://doi.org/10.1080/10942912.2016.1220393>

- 482 Ahmad, N., Feyes, D.K., Agarwal, R., Mukhtar, H., Nieminen, A.-L., 1997. Green tea constituent  
483 epigallocatechin-3-gallate and induction of apoptosis and cell cycle arrest in human  
484 carcinoma cells. *JNCI J. Natl. Cancer Inst.* 89, 1881–1886.  
485 <https://doi.org/10.1093/jnci/89.24.1881>
- 486 Ahmad, N., Gupta, S., Mukhtar, H., 2000. Green tea polyphenol epigallocatechin-3-gallate  
487 differentially modulates nuclear factor  $\kappa$ B in cancer cells versus normal cells. *Arch.*  
488 *Biochem. Biophys.* 376, 338–346. <https://doi.org/10.1006/abbi.2000.1742>
- 489 Ambawat, S., Sharma, P., Yadav, N.R., Yadav, R.C., 2013. MYB transcription factor genes as  
490 regulators for plant responses: an overview. *Physiol. Mol. Biol. Plants* 19, 307–321.  
491 <https://doi.org/10.1007/s12298-013-0179-1>
- 492 Asakawa, T., Hamashima, Y., Kan, T., 2013. Chemical synthesis of tea polyphenols and related  
493 compounds. *Curr. Pharm. Des.* 19, 6207–6217.  
494 <https://doi.org/10.2174/1381612811319340012>
- 495 Ashihara, H., Deng, W.-W., Mullen, W., Crozier, A., 2010. Distribution and biosynthesis of  
496 flavan-3-ols in *Camellia sinensis* seedlings and expression of genes encoding biosynthetic  
497 enzymes. *Phytochemistry* 71, 559–566.  
498 <https://doi.org/https://doi.org/10.1016/j.phytochem.2010.01.010>
- 499 Bailey, T.L., Boden, M., Buske, F.A., Frith, M., Grant, C.E., Clementi, L., Ren, J., Li, W.W.,  
500 Noble, W.S., 2009. MEME Suite: Tools for motif discovery and searching. *Nucleic Acids*  
501 *Res.* 37, 202–208. <https://doi.org/10.1093/nar/gkp335>
- 502 Bedon, F., Grima-Pettenati, J., Mackay, J., 2007. Conifer R2R3-MYB transcription factors:  
503 sequence analyses and gene expression in wood-forming tissues of white spruce (*Picea*  
504 *glauca*). *BMC Plant Biol.* 7, 17. <https://doi.org/10.1186/1471-2229-7-17>
- 505 Bontpart, T., Ferrero, M., Khater, F., Marlin, T., Vialet, S., Vallverdù-Queralt, A., Pinasseau, L.,  
506 Ageorges, A., Cheynier, V., Terrier, N., 2018. Focus on putative serine carboxypeptidase-  
507 like acyltransferases in grapevine. *Plant Physiol. Biochem.* 130, 356–366.

- 508 <https://doi.org/10.1016/j.plaphy.2018.07.023>
- 509 Cao, Z.-H., Zhang, S.-Z., Wang, R.-K., Zhang, R.-F., Hao, Y.-J., 2013. Genome wide analysis of  
510 the apple MYB transcription factor family allows the identification of *MdoMYB121* gene  
511 conferring abiotic stress tolerance in plants. PLoS One 8, e69955.  
512 <https://doi.org/10.1371/journal.pone.0069955>
- 513 Chen, C., Chen, H., Zhang, Y., Thomas, H.R., Frank, M.H., He, Y., Xia, R., 2020. TBtools: An  
514 integrative toolkit developed for interactive analyses of big biological data. Mol. Plant 13,  
515 1194–1202. <https://doi.org/10.1016/j.molp.2020.06.009>
- 516 Chen, X., Wang, P., Gu, M., Lin, X., Hou, B., Zheng, Y., Sun, Y., Jin, S., Ye, N., 2021. R2R3-  
517 MYB transcription factor family in tea plant (*Camellia sinensis*): Genome-wide  
518 characterization, phylogeny, chromosome location, structure and expression patterns.  
519 Genomics 113, 1565–1578. <https://doi.org/10.1016/j.ygeno.2021.03.033>
- 520 Chen, Y., Yu, M., Xu, J., Chen, X., Shi, J., 2009. Differentiation of eight tea (*Camellia sinensis*)  
521 cultivars in China by elemental fingerprint of their leaves. J. Sci. Food Agric. 89, 2350–  
522 2355. <https://doi.org/10.1002/jsfa.3716>
- 523 Cheng, Y., Zhu, W., Chen, Y., Ito, S., Asami, T., Wang, X., 2014. Brassinosteroids control root  
524 epidermal cell fate via direct regulation of a MYB-bHLH-WD40 complex by GSK3-like  
525 kinases. Elife 3. <https://doi.org/10.7554/eLife.02525>
- 526 Drew, B., 2019. The growth of tea. Nature 566, S2-S4. <https://doi.org/10.1038/d41586-019->  
527 00395-4
- 528 Du, H., Yang, S.-S., Liang, Z., Feng, B.-R., Liu, L., Huang, Y.-B., Tang, Y.-X., 2012. Genome-  
529 wide analysis of the MYB transcription factor superfamily in soybean. BMC Plant Biol. 12,  
530 106. <https://doi.org/10.1186/1471-2229-12-106>
- 531 Dubos, C., Stracke, R., Grotewold, E., Weisshaar, B., Martin, C., Lepiniec, L., 2010. MYB  
532 transcription factors in *Arabidopsis*. Trends Plant Sci. 15, 573–581.  
533 <https://doi.org/10.1016/j.tplants.2010.06.005>

- 534 Eungwanichayapant, P.D., Popluechai, S., 2009. Accumulation of catechins in tea in relation to  
535 accumulation of mRNA from genes involved in catechin biosynthesis. *Plant Physiol.*  
536 *Biochem.* 47, 94–97. <https://doi.org/https://doi.org/10.1016/j.plaphy.2008.11.002>
- 537 Fang, C., Fernie, A.R., Luo, J., 2019. Exploring the diversity of plant metabolism. *Trends Plant*  
538 *Sci.* 24, 83–98. <https://doi.org/https://doi.org/10.1016/j.tplants.2018.09.006>
- 539 Fukai, K., Ishigami, T., Hara, Y., 1991. Antibacterial activity of tea polyphenols against  
540 phytopathogenic bacteria. *Agric. Biol. Chem.* 55, 1895–1897.  
541 <https://doi.org/10.1080/00021369.1991.10870886>
- 542 Gigolashvili, T., Yatusевич, R., Berger, B., Müller, C., Flügge, U.-I., 2007. The R2R3-MYB  
543 transcription factor *HAG1/MYB28* is a regulator of methionine-derived glucosinolate  
544 biosynthesis in *Arabidopsis thaliana*. *Plant J.* 51, 247–261. [https://doi.org/10.1111/j.1365-](https://doi.org/10.1111/j.1365-313X.2007.03133.x)  
545 [313X.2007.03133.x](https://doi.org/10.1111/j.1365-313X.2007.03133.x)
- 546 Goicoechea, M., Lacombe, E., Legay, S., Mihaljevic, S., Rech, P., Jauneau, A., Lapierre, C.,  
547 Pollet, B., Verhaegen, D., Chaubet-Gigot, N., Grima-Pettenati, J., 2005. *EgMYB2*, a new  
548 transcriptional activator from Eucalyptus xylem, regulates secondary cell wall formation and  
549 lignin biosynthesis. *Plant J.* 43, 553–567. [https://doi.org/https://doi.org/10.1111/j.1365-](https://doi.org/https://doi.org/10.1111/j.1365-313X.2005.02480.x)  
550 [313X.2005.02480.x](https://doi.org/10.1111/j.1365-313X.2005.02480.x)
- 551 Gonzalez, A., Mendenhall, J., Huo, Y., Lloyd, A., 2009. *TTG1* complex MYBs, *MYB5* and *TT2*,  
552 control outer seed coat differentiation. *Dev. Biol.* 325, 412–421.  
553 <https://doi.org/https://doi.org/10.1016/j.ydbio.2008.10.005>
- 554 Guo, L., Winzer, T., Yang, X., Li, Y., Ning, Z., He, Z., Teodor, R., Lu, Y., Bowser, T.A., Graham,  
555 I.A., Ye, K., 2018. The opium poppy genome and morphinan production. *Science* 362, 343–  
556 347. <https://doi.org/10.1126/science.aat4096>
- 557 He, X., Zhao, X., Gao, L., Shi, X., Dai, X., Liu, Y., Xia, T., Wang, Y., 2018. Isolation and  
558 characterization of key genes that promote flavonoid accumulation in purple-leaf tea  
559 (*Camellia sinensis* L.). *Sci. Rep.* 8, 1–13. <https://doi.org/10.1038/s41598-017-18133-z>

- 560 Heim, K.E., Tagliaferro, A.R., Bobilya, D.J., 2002. Flavonoid antioxidants: chemistry, metabolism  
561 and structure-activity relationships. *J. Nutr. Biochem.* 13, 572–584.  
562 [https://doi.org/10.1016/s0955-2863\(02\)00208-5](https://doi.org/10.1016/s0955-2863(02)00208-5)
- 563 Hichri, I., Barrieu, F., Bogs, J., Kappel, C., Delrot, S., Lauvergeat, V., 2011. Recent advances in  
564 the transcriptional regulation of the flavonoid biosynthetic pathway. *J. Exp. Bot.* 62, 2465–  
565 2483. <https://doi.org/10.1093/jxb/erq442>
- 566 Howe, G.A., Jander, G., 2008. Plant immunity to insect herbivores. *Annu. Rev. Plant Biol.* 59, 41–  
567 66. <https://doi.org/10.1146/annurev.arplant.59.032607.092825>
- 568 Jiang, C., Gu, X., Peterson, T., 2004. Identification of conserved gene structures and carboxy-  
569 terminal motifs in the Myb gene family of *Arabidopsis* and *Oryza sativa* L. ssp. *indica*.  
570 *Genome Biol.* 5, R46. <https://doi.org/10.1186/gb-2004-5-7-r46>
- 571 Jin, H., Martin, C., 1999. Multifunctionality and diversity within the plant MYB-gene family.  
572 *Plant Mol. Biol.* 41, 577–585. <https://doi.org/10.1023/a:1006319732410>
- 573 Jiu, S., Guan, L., Leng, X., Zhang, K., Haider, M.S., Yu, X., Zhu, X., Zheng, T., Ge, M., Wang,  
574 C., Jia, H., Shangguan, L., Zhang, C., Tang, X., Abdullah, M., Javed, H.U., Han, J., Dong,  
575 Z., Fang, J., 2021. The role of *VvMYBA2r* and *VvMYBA2w* alleles of the *MYBA2* locus in the  
576 regulation of anthocyanin biosynthesis for molecular breeding of grape (*Vitis* spp.) skin  
577 coloration. *Plant Biotechnol. J.* 19, 1216–1239. <https://doi.org/10.1111/pbi.13543>
- 578 Kim, S.Y., Ahn, B.H., Min, K.J., Lee, Y.H., Joe, E.H., Min, D.S., 2004. Phospholipase D  
579 isozymes mediate epigallocatechin gallate-induced cyclooxygenase-2 expression in astrocyte  
580 cells. *J. Biol. Chem.* 279, 38125. <https://doi.org/10.1074/jbc.M402085200>
- 581 Kranz, H.D., Denekamp, M., Greco, R., Jin, H., Leyva, A., Meissner, R.C., Petroni, K., Urzainqui,  
582 A., Bevan, M., Martin, C., Smekens, S., Tonelli, C., Paz-Ares, J., Weisshaar, B., 1998.  
583 Towards functional characterisation of the members of the *R2R3-MYB* gene family from  
584 *Arabidopsis thaliana*. *Plant J.* 16, 263–276. <https://doi.org/10.1046/j.1365-313x.1998.00278.x>

- 586 Kumar, S., Stecher, G., Tamura, K., 2016. MEGA7: Molecular evolutionary genetics analysis  
587 version 7.0 for bigger datasets. *Mol. Biol. Evol.* 33, 1870–1874.  
588 <https://doi.org/10.1093/molbev/msw054>
- 589 Li, M., Li, Y., Guo, L., Gong, N., Pang, Y., Jiang, W., Liu, Y., Jiang, X., Zhao, L., Wang, Y., Xie,  
590 D.-Y., Gao, L., Xia, T., 2017. Functional characterization of tea (*Camellia sinensis*) *MYB4a*  
591 transcription factor using an integrative approach. *Front. Plant Sci.* 8, 943.  
592 <https://doi.org/10.3389/fpls.2017.00943>
- 593 Li, S., Sun, L., Fan, X., Zhang, Y., Jiang, J., Liu, C., 2020. Functional analysis of *Vitis davidii*  
594 R2R3-MYB transcription factor *VdMYB14* in the regulation of flavonoid biosynthesis. *J.*  
595 *Fruit Sci.* 37, 783–792. <https://doi.org/10.13925/j.cnki.gsxb.20190577>
- 596 Li, W., Ding, Z., Ruan, M., Yu, X., Peng, M., Liu, Y., 2017. Kiwifruit R2R3-MYB transcription  
597 factors and contribution of the novel *AcMYB75* to red kiwifruit anthocyanin biosynthesis.  
598 *Sci. Rep.* 7, 16861. <https://doi.org/10.1038/s41598-017-16905-1>
- 599 Li, X., Xue, C., Li, J., Qiao, X., Li, L., Yu, L., Huang, Y., Wu, J., 2016. Genome-wide  
600 identification, evolution and functional divergence of MYB transcription factors in Chinese  
601 White Pear (*Pyrus bretschneideri*). *Plant Cell Physiol.* 57, 824–847.  
602 <https://doi.org/10.1093/pcp/pcw029>
- 603 Lipsick, J.S., 1996. One billion years of Myb. *Oncogene* 13, 223–235.
- 604 Liu, Y., Gao, L., Liu, L., Yang, Q., Lu, Z., Nie, Z., Wang, Y., Xia, T., 2012. Purification and  
605 characterization of a novel galloyltransferase involved in catechin galloylation in the tea  
606 plant (*Camellia sinensis*)\*. *J. Biol. Chem.* 287, 44406–44417.  
607 <https://doi.org/https://doi.org/10.1074/jbc.M112.403071>
- 608 Livak, K.J., Schmittgen, T.D., 2001. Analysis of relative gene expression data using real-time  
609 quantitative PCR and the  $2^{-(\Delta\Delta C(T))}$  Method. *Methods* 25, 402–408.  
610 <https://doi.org/10.1006/meth.2001.1262>
- 611 Martin, C., Paz-Ares, J., 1997. MYB transcription factors in plants. *Trends Genet.* 13, 67–73.

- 612 [https://doi.org/https://doi.org/10.1016/S0168-9525\(96\)10049-4](https://doi.org/https://doi.org/10.1016/S0168-9525(96)10049-4)
- 613 Matus, J.T., Aquea, F., Arce-Johnson, P., 2008. Analysis of the grape MYB R2R3 subfamily  
614 reveals expanded wine quality-related clades and conserved gene structure organization  
615 across *Vitis* and *Arabidopsis* genomes. *BMC Plant Biol.* 8, 83. [https://doi.org/10.1186/1471-](https://doi.org/10.1186/1471-2229-8-83)  
616 [2229-8-83](https://doi.org/10.1186/1471-2229-8-83)
- 617 Mehrtens, F., Kranz, H., Bednarek, P., Weisshaar, B., 2005. The *Arabidopsis* transcription factor  
618 MYB12 is a flavonol-specific regulator of phenylpropanoid biosynthesis. *Plant Physiol.*  
619 138, 1083–1096. <https://doi.org/10.1104/pp.104.058032>
- 620 Millard, P.S., Kragelund, B.B., Burow, M., 2019. R2R3 MYB transcription factors – functions  
621 outside the DNA-binding domain. *Trends Plant Sci.* 24, 934–946.  
622 <https://doi.org/https://doi.org/10.1016/j.tplants.2019.07.003>
- 623 Mondal, T.K., Bhattacharya, A., Laxmikumaran, M., Ahuja, P.S., 2004. Recent advances of tea  
624 (*Camellia sinensis*) biotechnology. *Plant Cell. Tissue Organ Cult.* 76, 195–254.  
625 <https://doi.org/10.1023/B:TICU.0000009254.87882.71>
- 626 Nesi, N., Jond, C., Debeaujon, I., Caboche, M., Lepiniec, L., 2001. The *Arabidopsis* *TT2* gene  
627 encodes an R2R3 MYB domain protein that acts as a key determinant for proanthocyanidin  
628 accumulation in developing seed. *Plant Cell* 13, 2099–2114.  
629 <https://doi.org/10.1105/tpc.010098>
- 630 Nikoo, M., Regenstein, J.M., Ahmadi Gavlighi, H., 2018. Antioxidant and antimicrobial activities  
631 of (-)-epigallocatechin-3-gallate (EGCG) and its potential to preserve the quality and safety  
632 of foods. *Compr. Rev. Food Sci. Food Saf.* 17, 732–753. [https://doi.org/10.1111/1541-](https://doi.org/10.1111/1541-4337.12346)  
633 [4337.12346](https://doi.org/10.1111/1541-4337.12346)
- 634 Ogata, K., Morikawa, S., Nakamura, H., Hojo, H., Yoshimura, S., Zhang, R., Aimoto, S.,  
635 Ametani, Y., Hirata, Z., Sarai, A., Ishii, S., Nishimura, Y., 1995. Comparison of the free and  
636 DNA-complexed forms of the DMA-binding domain from c-Myb. *Nat. Struct. Biol.* 2, 309–  
637 320. <https://doi.org/10.1038/nsb0495-309>



- 638 Park, M.-R., Yun, K.-Y., Mohanty, B., Herath, V., Xu, F., Wijaya, E., Bajic, V.B., Yun, S.-J., De  
639 Los Reyes, B.G., 2010. Supra-optimal expression of the cold-regulated OsMyb4  
640 transcription factor in transgenic rice changes the complexity of transcriptional network  
641 with major effects on stress tolerance and panicle development. *Plant. Cell Environ.* 33,  
642 2209–2230. <https://doi.org/10.1111/j.1365-3040.2010.02221.x>
- 643 Patzlaff, A., McInnis, S., Courtenay, A., Surman, C., Newman, L.J., Smith, C., Bevan, M.W.,  
644 Mansfield, S., Whetten, R.W., Sederoff, R.R., Campbell, M.M., 2003. Characterisation of a  
645 pine MYB that regulates lignification. *Plant J.* 36, 743–754.  
646 <https://doi.org/https://doi.org/10.1046/j.1365-313X.2003.01916.x>
- 647 Plomion, C., Leprovost, G., Stokes, A., 2001. Wood formation in trees. *Plant Physiol.* 127, 1513–  
648 1523. <https://doi.org/10.1104/pp.010816>
- 649 Punyasiri, P.A.N., Abeysinghe, I.S.B., Kumar, V., Treutter, D., Duy, D., Gosch, C., Martens, S.,  
650 Forkmann, G., Fischer, T.C., 2004. Flavonoid biosynthesis in the tea plant *Camellia*  
651 *sinensis*: properties of enzymes of the prominent epicatechin and catechin pathways. *Arch.*  
652 *Biochem. Biophys.* 431, 22–30. <https://doi.org/https://doi.org/10.1016/j.abb.2004.08.003>
- 653 Sakanaka, S., Juneja, L.R., Taniguchi, M., 2000. Antimicrobial effects of green tea polyphenols on  
654 thermophilic spore-forming bacteria. *J. Biosci. Bioeng.* 90, 81–85.  
655 [https://doi.org/10.1016/s1389-1723\(00\)80038-9](https://doi.org/10.1016/s1389-1723(00)80038-9)
- 656 Savage, N., Yang, T.J.W., Chen, C.Y., Lin, K.-L., Monk, N.A.M., Schmidt, W., 2013. Positional  
657 signaling and expression of *ENHANCER OF TRY AND CPC1* are tuned to increase root  
658 hair density in response to phosphate deficiency in *Arabidopsis thaliana*. *PLoS One* 8,  
659 e75452. <https://doi.org/10.1371/journal.pone.0075452>
- 660 Schenke, D., Cai, D., Scheel, D., 2014. Suppression of UV-B stress responses by flg22 is  
661 regulated at the chromatin level via histone modification. *Plant. Cell Environ.* 37, 1716–  
662 1721. <https://doi.org/10.1111/pce.12283>
- 663 Shoji, T., Umemoto, N., Saito, K., 2021. Genetic divergence in transcriptional regulators of

- 664 defense metabolism: insight into plant domestication and improvement. *Plant Mol. Biol.*  
665 <https://doi.org/10.1007/s11103-021-01159-3>
- 666 Singh, K., Kumar, S., Rani, A., Gulati, A., Ahuja, P.S., 2009a. Phenylalanine ammonia-lyase  
667 (PAL) and cinnamate 4-hydroxylase (C4H) and catechins (flavan-3-ols) accumulation in  
668 tea. *Funct. Integr. Genomics* 9, 125–134. <https://doi.org/10.1007/s10142-008-0092-9>
- 669 Singh, K., Rani, A., Kumar, S., Sood, P., Mahajan, M., Yadav, S.K., Singh, B., Ahuja, P.S., 2008.  
670 An early gene of the flavonoid pathway, flavanone 3-hydroxylase, exhibits a positive  
671 relationship with the concentration of catechins in tea (*Camellia sinensis*). *Tree Physiol.* 28,  
672 1349–1356. <https://doi.org/10.1093/treephys/28.9.1349>
- 673 Singh, K., Rani, A., Paul, A., Dutt, S., Joshi, R., Gulati, A., Ahuja, P.S., Kumar, S., 2009b.  
674 Differential display mediated cloning of anthocyanidin reductase gene from tea (*Camellia*  
675 *sinensis*) and its relationship with the concentration of epicatechins. *Tree Physiol.* 29, 837–  
676 846. <https://doi.org/10.1093/treephys/tpp022>
- 677 Soler, M., Camargo, E.L.O., Carocha, V., Cassan-Wang, H., San Clemente, H., Savelli, B., Hefer,  
678 C.A., Paiva, J.A.P., Myburg, A.A., Grima-Pettenati, J., 2015. The eucalyptus grandis R2R3-  
679 MYB transcription factor family: Evidence for woody growth-related evolution and  
680 function. *New Phytol.* 206, 1364–1377. <https://doi.org/10.1111/nph.13039>
- 681 Steinmann, J., Buer, J., Pietschmann, T., Steinmann, E., 2013. Anti-infective properties of  
682 epigallocatechin-3-gallate (EGCG), a component of green tea. *Br. J. Pharmacol.* 168, 1059–  
683 1073. <https://doi.org/10.1111/bph.12009>
- 684 Stracke, R., Werber, M., Weisshaar, B., 2001. The R2R3-MYB gene family in *Arabidopsis*  
685 *thaliana*. *Curr. Opin. Plant Biol.* 4, 447–456. [https://doi.org/10.1016/s1369-5266\(00\)00199-](https://doi.org/10.1016/s1369-5266(00)00199-0)  
686 0
- 687 Sun, B., Zhu, Z., Cao, P., Chen, H., Chen, C., Zhou, X., Mao, Y., Lei, J., Jiang, Y., Meng, W.,  
688 Wang, Y., Liu, S., 2016. Purple foliage coloration in tea (*Camellia sinensis* L.) arises from  
689 activation of the R2R3-MYB transcription factor CsAN1. *Sci. Rep.* 6.

- 690 <https://doi.org/10.1038/srep32534>
- 691 Surh, Y.-J., 2003. Cancer chemoprevention with dietary phytochemicals. *Nat. Rev. Cancer* 3,  
692 768–780. <https://doi.org/10.1038/nrc1189>
- 693 Taguri, T., Tanaka, T., Kouno, I., 2004. Antimicrobial activity of 10 different plant polyphenols  
694 against bacteria causing food-borne disease. *Biol. Pharm. Bull.* 27, 1965–1969.  
695 <https://doi.org/10.1248/bpb.27.1965>
- 696 Teng, S., Keurentjes, J., Bentsink, L., Koornneef, M., Smeekens, S., 2005. Sucrose-specific  
697 induction of anthocyanin biosynthesis in *Arabidopsis* requires the *MYB75/PAP1* gene. *Plant*  
698 *Physiol.* 139, 1840–1852. <https://doi.org/10.1104/pp.105.066688>
- 699 Velasco, R., Zharkikh, A., Troglio, M., Cartwright, D.A., Cestaro, A., Pruss, D., Pindo, M.,  
700 FitzGerald, L.M., Vezzulli, S., Reid, J., Malacarne, G., Iliev, D., Coppola, G., Wardell, B.,  
701 Micheletti, D., Macalma, T., Facci, M., Mitchell, J.T., Perazzolli, M., Eldredge, G., Gatto,  
702 P., Oyzerski, R., Moretto, M., Gutin, N., Stefanini, M., Chen, Y., Segala, C., Davenport, C.,  
703 Dematté, L., Mraz, A., Battilana, J., Stormo, K., Costa, F., Tao, Q., Si-Ammour, A.,  
704 Harkins, T., Lackey, A., Perbost, C., Taillon, B., Stella, A., Solovyev, V., Fawcett, J.A.,  
705 Sterck, L., Vandepoele, K., Grando, S.M., Toppo, S., Moser, C., Lanchbury, J., Bogden, R.,  
706 Skolnick, M., Sgaremella, V., Bhatnagar, S.K., Fontana, P., Gutin, A., Van de Peer, Y.,  
707 Salamini, F., Viola, R., 2007. A high quality draft consensus sequence of the genome of a  
708 heterozygous grapevine variety. *PLoS One* 2. <https://doi.org/10.1371/journal.pone.0001326>
- 709 Wei, C., Yang, H., Wang, S., Zhao, J., Liu, C., Gao, L., Xia, E., Lu, Y., Tai, Y., She, G., Sun, J.,  
710 Cao, H., Tong, W., Gao, Q., Li, Y., Deng, W., Jiang, X., Wang, W., Chen, Q., Zhang, S., Li,  
711 H., Wu, J., Wang, P., Li, P., Shi, C., Zheng, F., Jian, J., Huang, B., Shan, D., Shi, M., Fang,  
712 C., Yue, Y., Li, F., Li, D., Wei, S., Han, B., Jiang, C., Yin, Y., Xia, T., Zhang, Z.,  
713 Bennetzen, J.L., Zhao, S., Wan, X., 2018. Draft genome sequence of *Camellia sinensis* var.  
714 *sinensis* provides insights into the evolution of the tea genome and tea quality. *Proc. Natl.*  
715 *Acad. Sci. U. S. A.* 115, E4151–E4158. <https://doi.org/10.1073/pnas.1719622115>
- 716 Wei, K., Wang, L., Zhang, Y., Ruan, L., Li, H., Wu, L., Xu, L., Zhang, C., Zhou, X., Cheng, H.,

- 717 Edwards, R., 2019. A coupled role for *CsMYB75* and *CsGSTF1* in anthocyanin  
718 hyperaccumulation in purple tea. *Plant J.* 97, 825–840. <https://doi.org/10.1111/tpj.14161>
- 719 Wilkins, O., Nahal, H., Foong, J., Provart, N.J., Campbell, M.M., 2009. Expansion and  
720 diversification of the *Populus* R2R3-MYB family of transcription factors. *Plant Physiol.*  
721 149, 981–993. <https://doi.org/10.1104/pp.108.132795>
- 722 Yamashita, H., Uchida, T., Tanaka, Y., Katai, H., Nagano, A.J., Morita, A., Ikka, T., 2020.  
723 Genomic predictions and genome-wide association studies based on RAD-seq of quality-  
724 related metabolites for the genomics-assisted breeding of tea plants. *Sci. Rep.* 10, 17480.  
725 <https://doi.org/10.1038/s41598-020-74623-7>
- 726 Yang, D., Liu, Y., Sun, M., Zhao, L., Wang, Y., Chen, X., Wei, C., Gao, L., Xia, T., 2012.  
727 Differential gene expression in tea (*Camellia sinensis* L.) calli with different morphologies  
728 and catechin contents. *J. Plant Physiol.* 169, 163–175.  
729 <https://doi.org/https://doi.org/10.1016/j.jplph.2011.08.015>
- 730 Yokozawa, T., Dong, E., Nakagawa, T., Kashiwagi, H., Nakagawa, H., Takeuchi, S., Chung,  
731 H.Y., 1998. In Vitro and in Vivo studies on the radical-scavenging activity of tea. *J. Agric.*  
732 *Food Chem.* 46, 2143–2150. <https://doi.org/10.1021/jf970985c>
- 733 Yu, M., Man, Y., Lei, R., Lu, X., Wang, Y., 2020. Metabolomics study of flavonoids and  
734 anthocyanin-related gene analysis in kiwifruit (*Actinidia chinensis*) and kiwiberry (*Actinidia*  
735 *arguta*). *Plant Mol. Biol. Report.* 38, 353–369. <https://doi.org/10.1007/s11105-020-01200-7>
- 736 Yu, S., Li, P., Zhao, X., Tan, M., Ahmad, M.Z., Xu, Y., Tadege, M., Zhao, J., 2021. *CsTCPs*  
737 regulate shoot tip development and catechin biosynthesis in tea plant (*Camellia sinensis*).  
738 *Hortic. Res.* 8, 104. <https://doi.org/10.1038/s41438-021-00538-7>
- 739 Yu, X., Xiao, J., Chen, S., Yu, Y., Ma, J., Lin, Y., Li, R., Lin, J., Fu, Z., Zhou, Q., Chao, Q., Chen,  
740 L., Yang, Z., Liu, R., 2020. Metabolite signatures of diverse *Camellia sinensis* tea  
741 populations. *Nat. Commun.* 11, 5586. <https://doi.org/10.1038/s41467-020-19441-1>
- 742 Zhang, P., Chopra, S., Peterson, T., 2000. A segmental gene duplication generated differentially

743 expressed *myb*-homologous genes in Maize. *Plant Cell* 12, 2311.

744 <https://doi.org/10.2307/3871231>

745 Zhang, Y., Butelli, E., Martin, C., 2014. Engineering anthocyanin biosynthesis in plants. *Curr.*

746 *Opin. Plant Biol.* 19, 81–90. <https://doi.org/10.1016/j.pbi.2014.05.011>

747 Zhu, Z., Sun, B., Cai, W., Zhou, X., Mao, Y., Chen, Chengjie, Wei, J., Cao, B., Chen, Changming,

748 Chen, G., Lei, J., 2019. Natural variations in the MYB transcription factor *MYB31* determine

749 the evolution of extremely pungent peppers. *New Phytol.* <https://doi.org/10.1111/nph.15853>

750

### 751 **Annotation of figures**

752 **Figure 1.** Phylogenetic analysis of the R2R3-MYB families in *C. sinensis* and *A. thaliana*. A

753 neighbor-joining phylogenetic tree was constructed from 244 protein sequences including all R2R3-

754 MYB proteins from *C. sinensis* (118) and *A. thaliana* (126). Subgroups within each clade were given

755 a different color; meanwhile, the same color indicates the genes are in the same subgroup. Subgroup

756 short names are included next to each clade to simplify nomenclature. Subgroups that evolved and

757 expanded exclusively in the *C. sinensis* genome are highlighted in red and marked with a red star.

758

759 **Figure 2.** Phylogenetic analysis of the candidate subgroups in six plant species. A neighbor-joining

760 phylogenetic tree was constructed with the R2R3-MYB proteins from *C. sinensis*, *Actinidia*

761 *chinensis*, *Vitis vinifera*, *Theobroma cacao*, *Coffea canephora* and *Arabidopsis* genomes. Subgroup

762 short names are indicated beside each clade.

763

764 **Figure 3.** Analysis of R2 and R3 domains of *C. sinensis* R2R3-MYB TFs. The sequence logos of

765 the R2 (A) and R3 (B) MYB repeats were determined via multiple sequence alignment of the R2R3-

766 MYB proteins. The bit score indicates the information content for each position in the sequence.

767 Highly conserved Trp residues critical for DNA binding in the MYB domain are highlighted in red.

768 **Figure 4.** Phylogenetic relationships and conserved motifs of *C. sinensis* R2R3-MYB TFs. The  
769 neighbor-joining tree of 118 R2R3-MYB proteins is shown on the left, and the structures of 20  
770 conserved motifs in R2R3-MYB TFs, predicted by MEME Suite, are shown on the right.

771

772 **Figure 5.** Heatmap of the 118 *CsR2R3-MYB* genes transcribed in the tissues of *C. sinensis*. The 118  
773 *CsR2R3-MYB* genes clustered into seven expression groups, based on their tissue-specific  
774 expression. The gene name is indicated on the left of the heatmap, and the short name of the  
775 phylogenetic subgroup is on the right. Transcript abundance is expressed in standardized log2  
776 fragments per kilobase of exon per million fragments mapped (FPKM) values. Next to each RNA-  
777 seq-based cluster, there is a graph with the mean transcript abundance for the entire cluster in each  
778 tissue. AB, apical bud; YL, young leaf; ML, mature leaf; OL, old leaf; S, stem; R, root; Fl, flower;  
779 Fr, fruit. Data were obtained from the Tea Plant Information Archive (<http://tpia.teaplant.org/>).

780

781 **Figure 6.** Expression pattern analysis and correlation analysis of tea-specific or tea-expanded  
782 *CsR2R3-MYBs*. (A) The biosynthetic pathway of catechins. *CHS*, *CHI*, *F3H*, *F3'H*, *F3'5'H*, *DFR*,  
783 *ANS*, *LAR*, *ANR* and *SCPLIA* represent genes encoding chalcone synthase, chalcone isomerase,  
784 flavanone 3-hydroxylase, flavonoid 3'-hydroxylase, flavonoid 3',5'-hydroxylase, dihydroflavonol  
785 4-reductase, anthocyanidin synthase, leucoanthocyanidin reductase, anthocyanidin reductase and  
786 type 1A serine carboxypeptidase-like acyltransferases, respectively. (B) The contents of six catechin  
787 monomers in eight tissues. (C) Heatmap of RNA-seq transcript abundance patterns of the 20  
788 *CsR2R3-MYB* genes from the *C. sinensis* genome in eight different tissues. AB, apical bud; YL,  
789 young leaf; ML, mature leaf; OL, old leaf; S, stem; R, root; Fl, flower; Fr, fruit. (D) Correlative  
790 analysis of *CsR2R3-MYB* genes, structural genes and catechins accumulation patterns in eight  
791 representative tissues of *C. sinensis* plants.  $R > 0.5$  indicates a positive correlation;  $R < -0.5$  indicates  
792 a negative correlation. Data were obtained from the Tea Plant Information Archive  
793 (<http://tpia.teaplant.org/>).

794

795 **Figure 7.** Expression profiling validation and correlation analysis. (A) The contents of six catechin  
796 monomers in seven tissues as measured with an HPLC system. (B) Heatmap of qRT-PCR transcript  
797 abundance patterns in seven different tissues. (C) Correlative analysis of four potential *CsR2R3-*  
798 *MYB* TFs, catechin biosynthesis genes and catechin accumulation patterns in different tissues of tea  
799 plants.  $R > 0.5$ , positive correlation;  $R < -0.5$ , negative correlation. AB, apical bud; YL, young leaf;  
800 SL, second leaf; ML, mature leaf; OL, old leaf; S, stem; R, root.

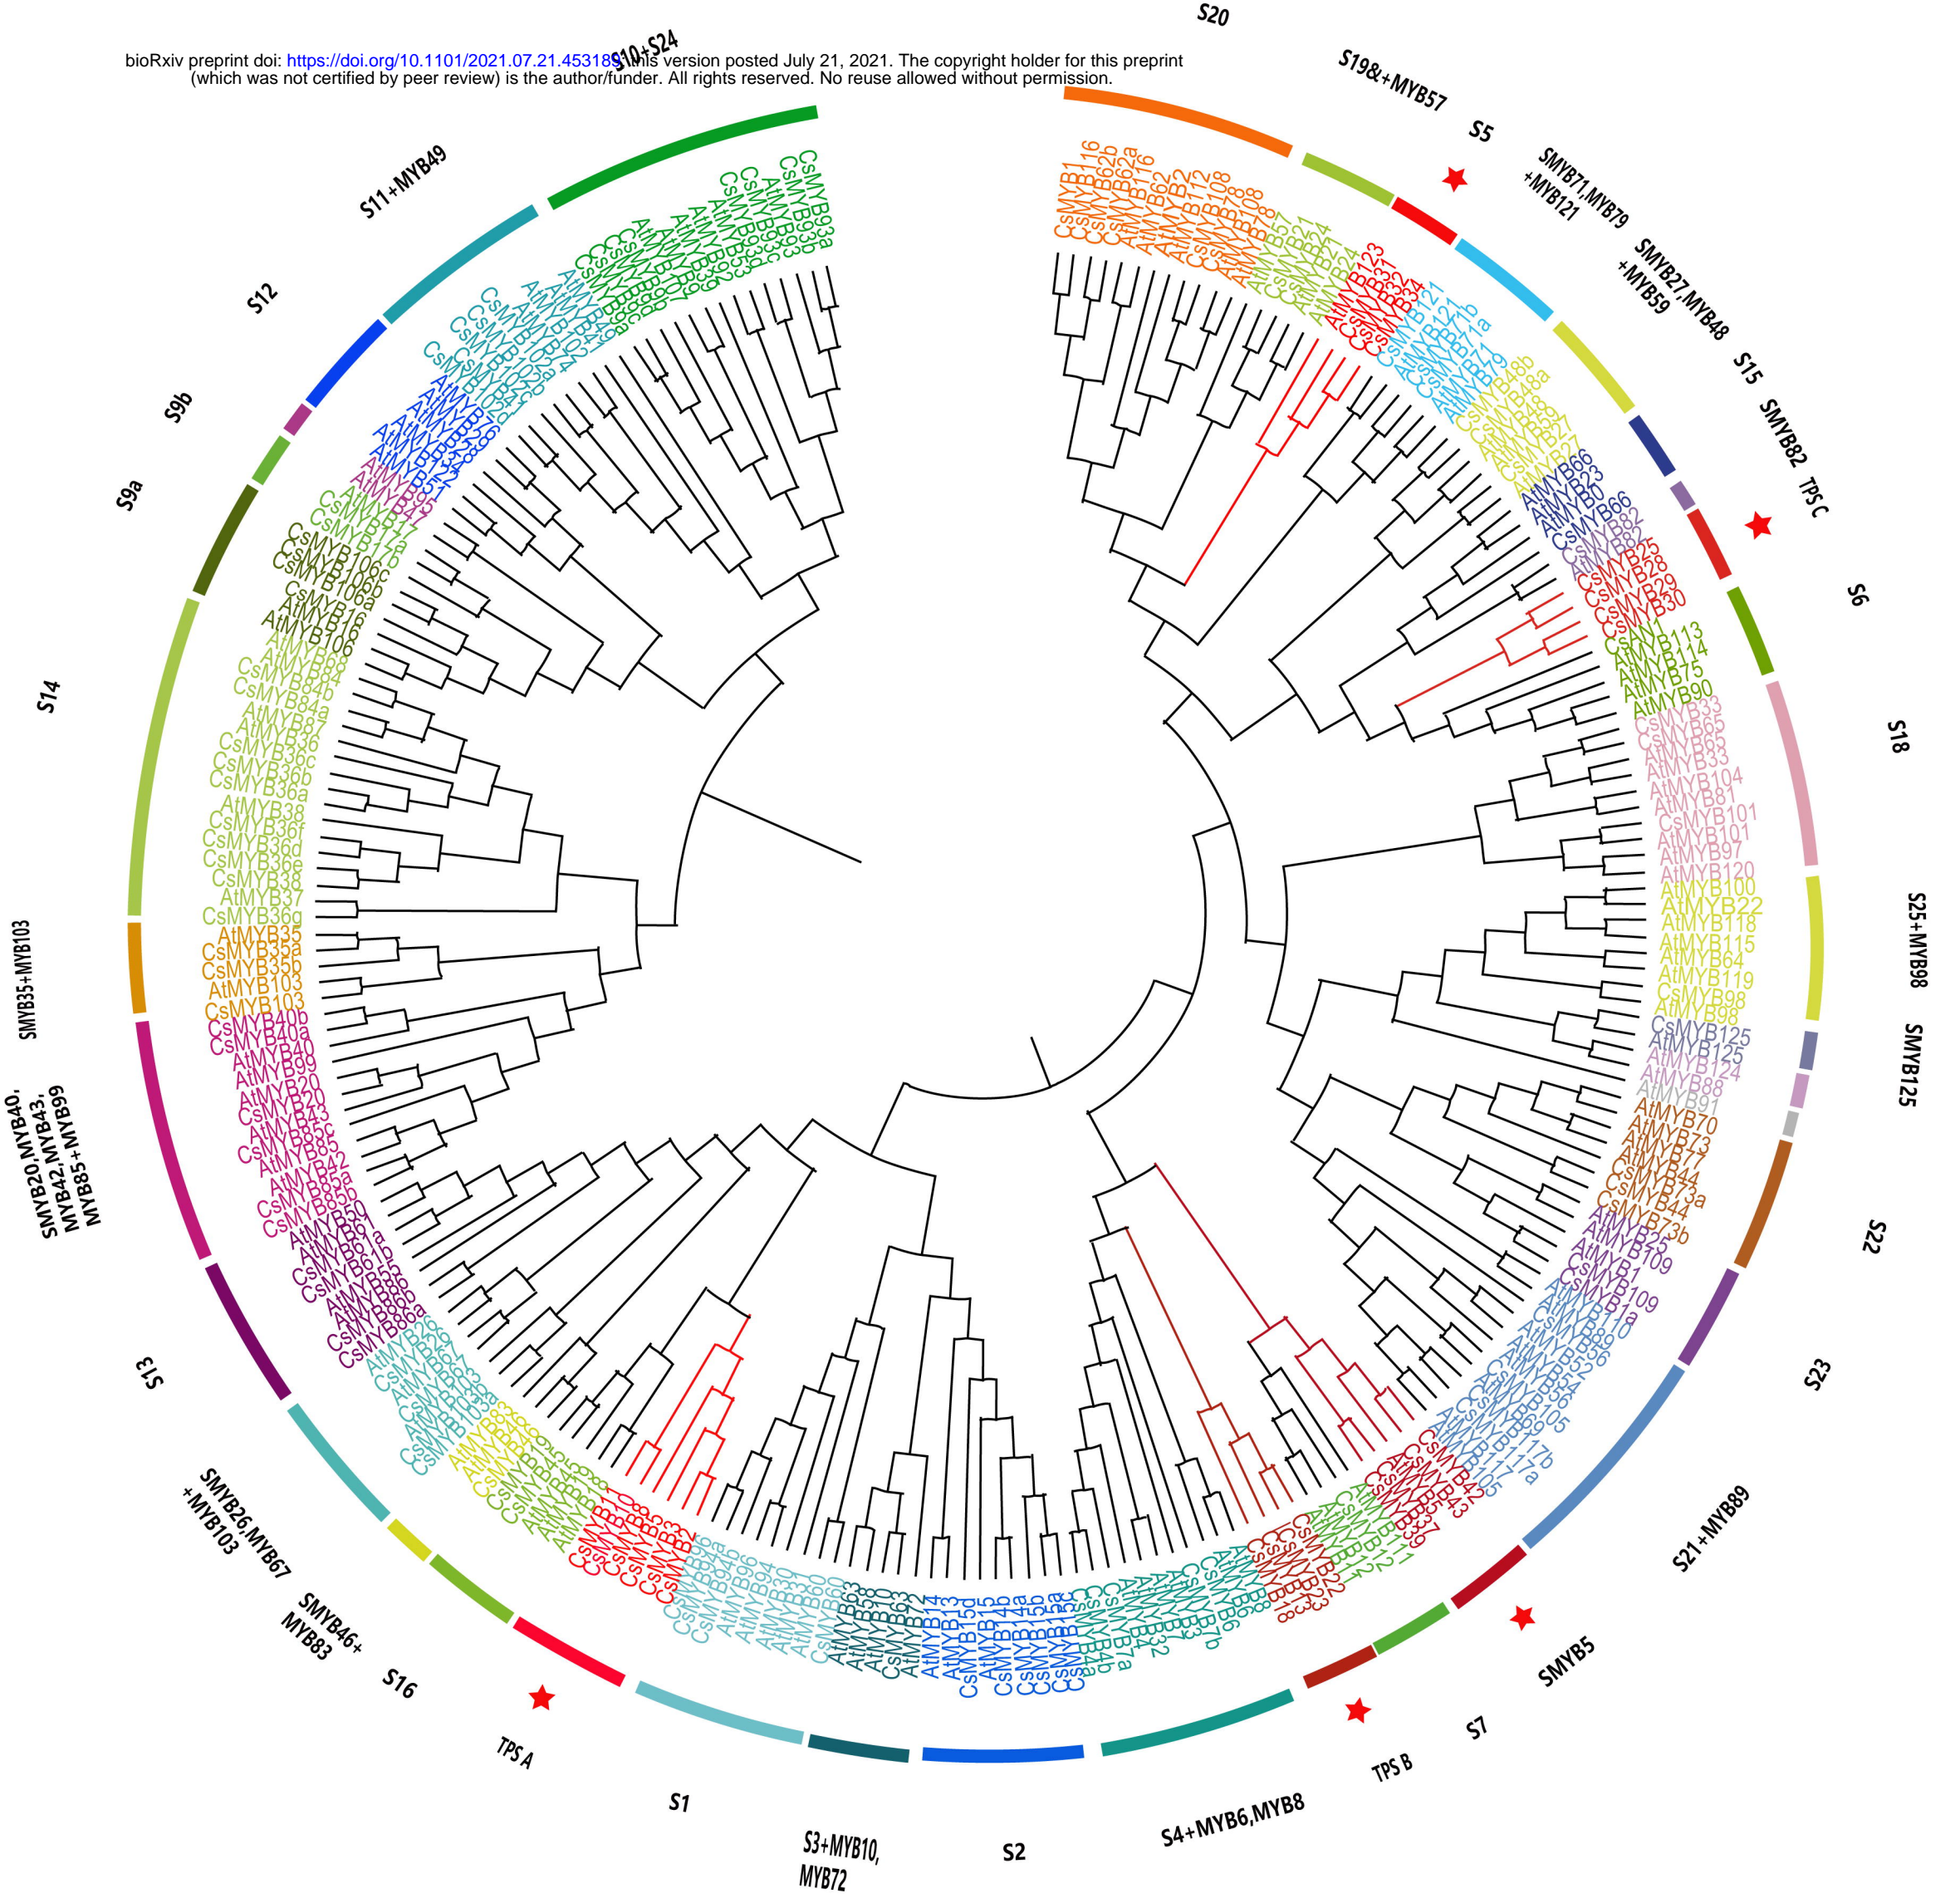



# TPS C

# SMYB5

bioRxiv preprint doi: <https://doi.org/10.1101/202107.145318>; this version posted July 21, 2021. The copyright holder for this preprint (which was not certified by peer review) is the author/funder. All rights reserved. No reuse allowed without permission.

# S5

# TPS B

# TPS A

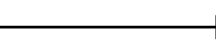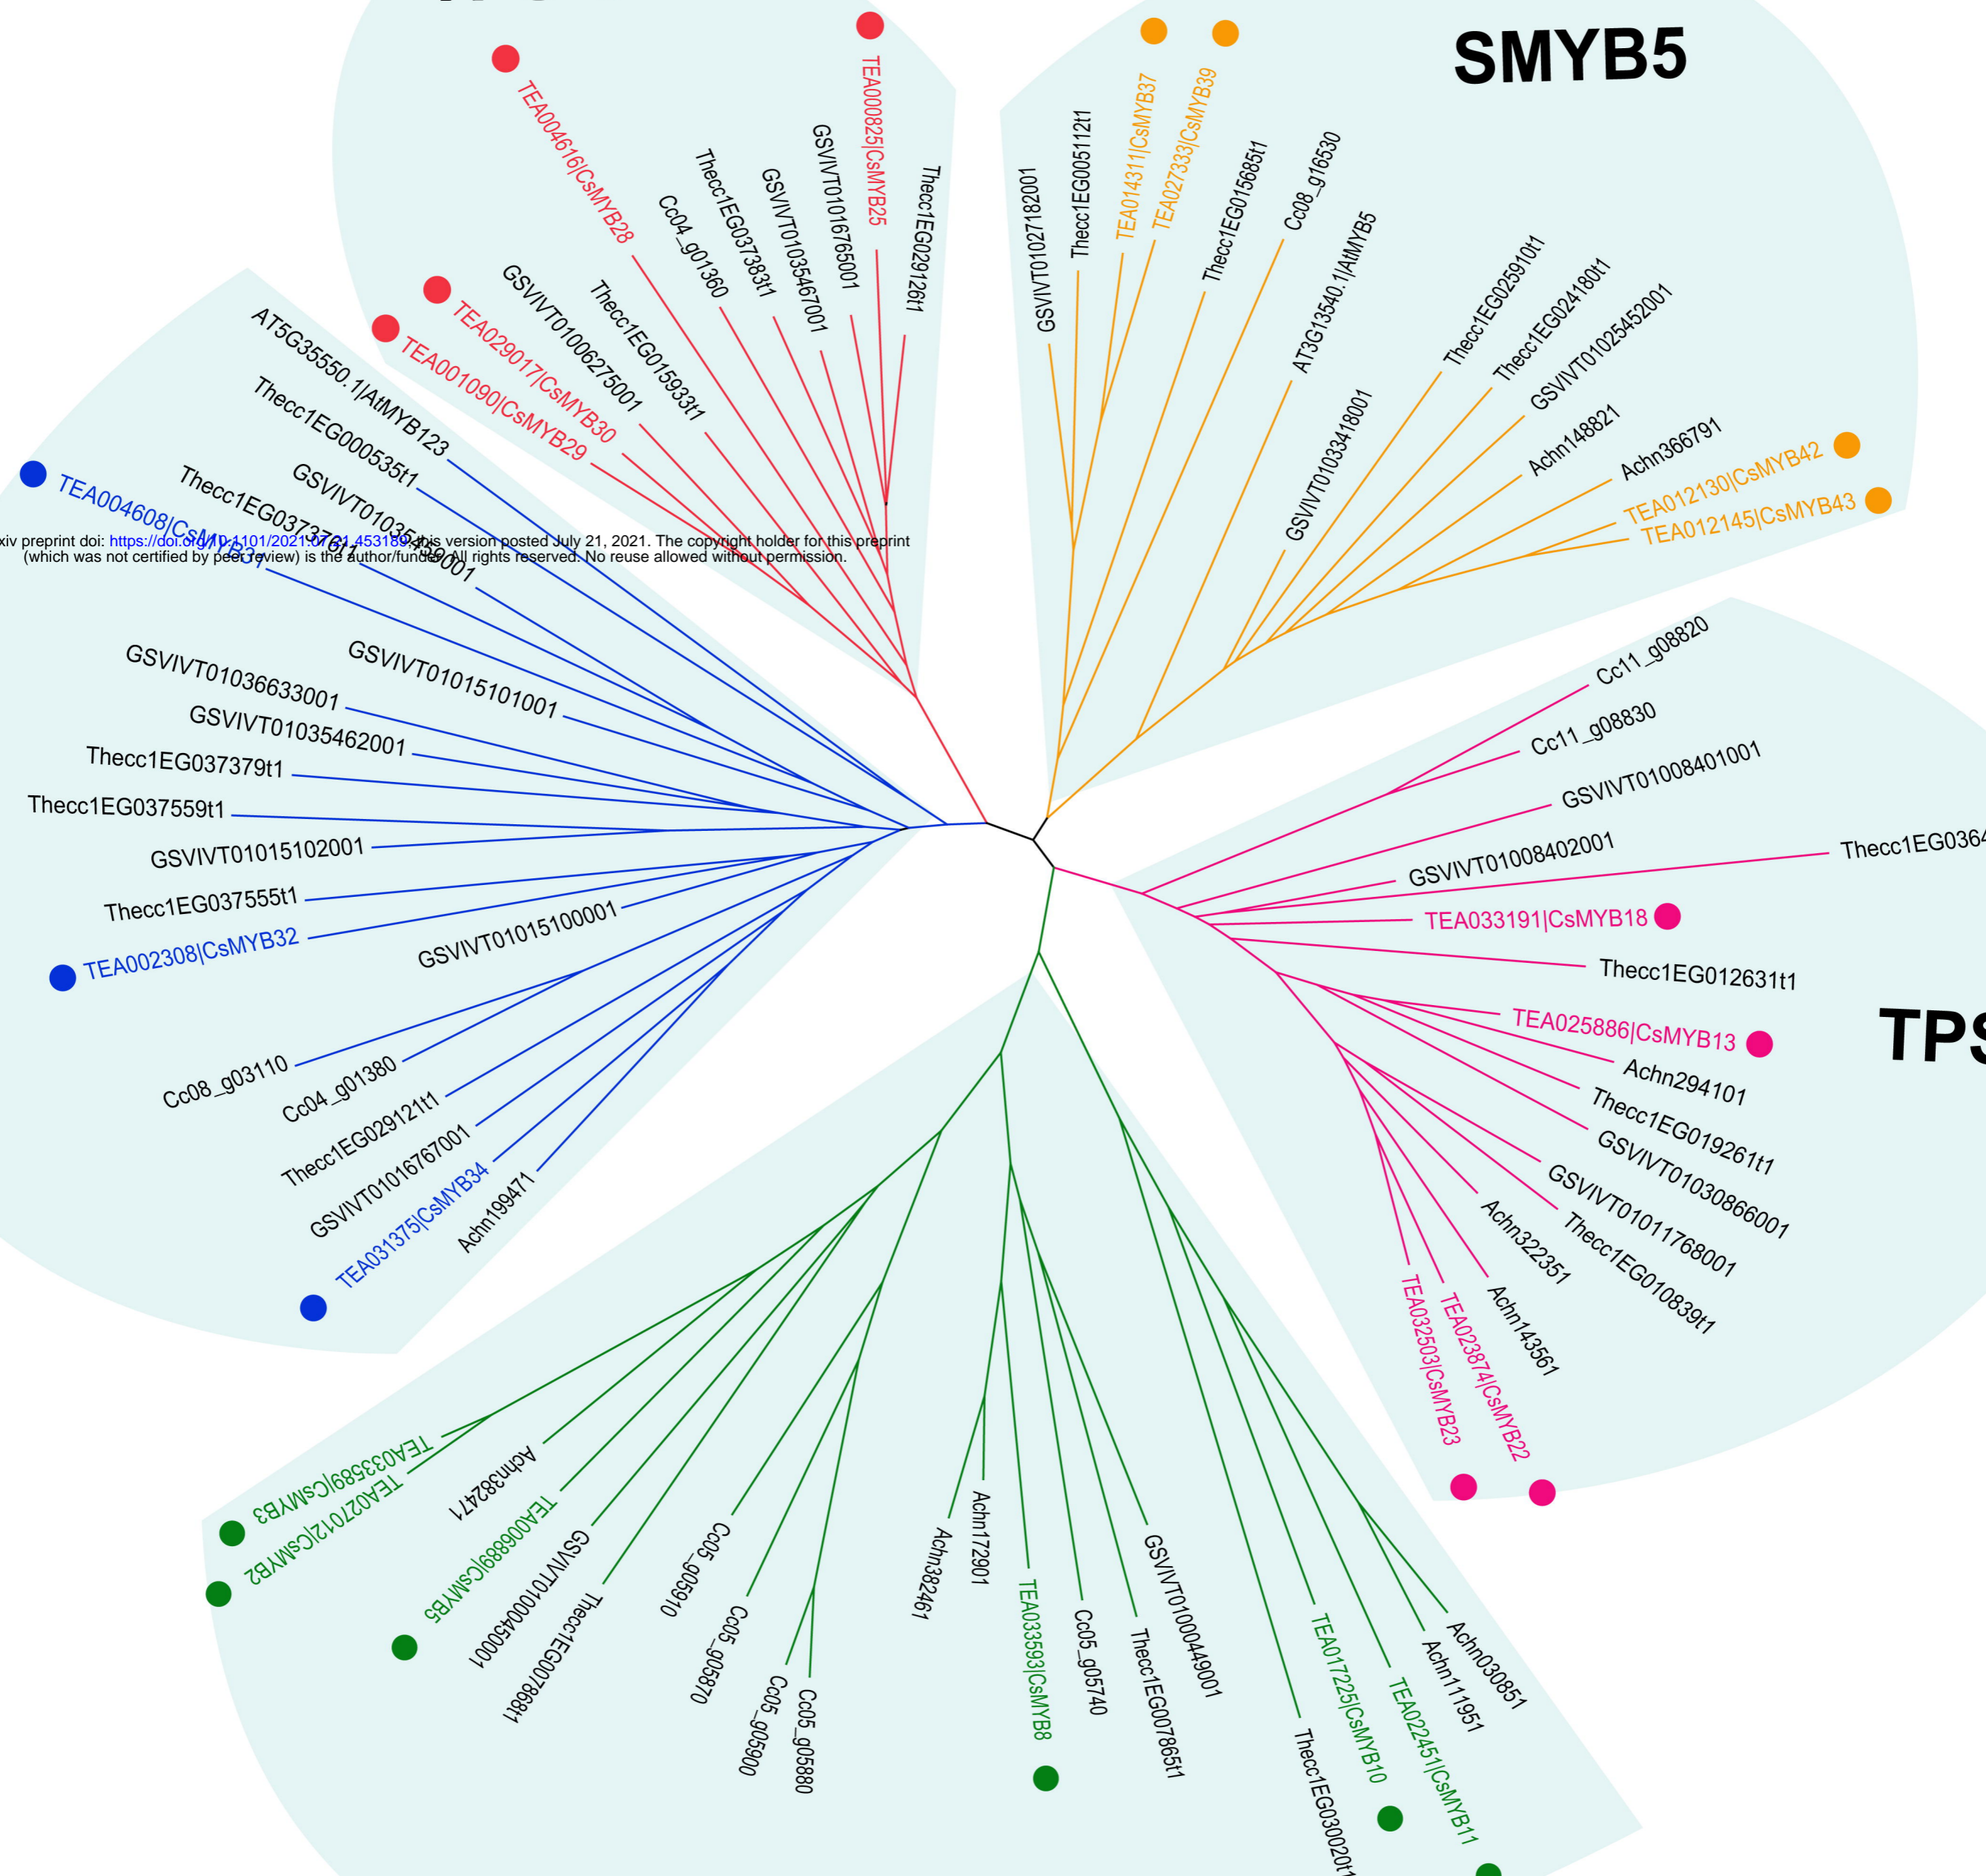

**A**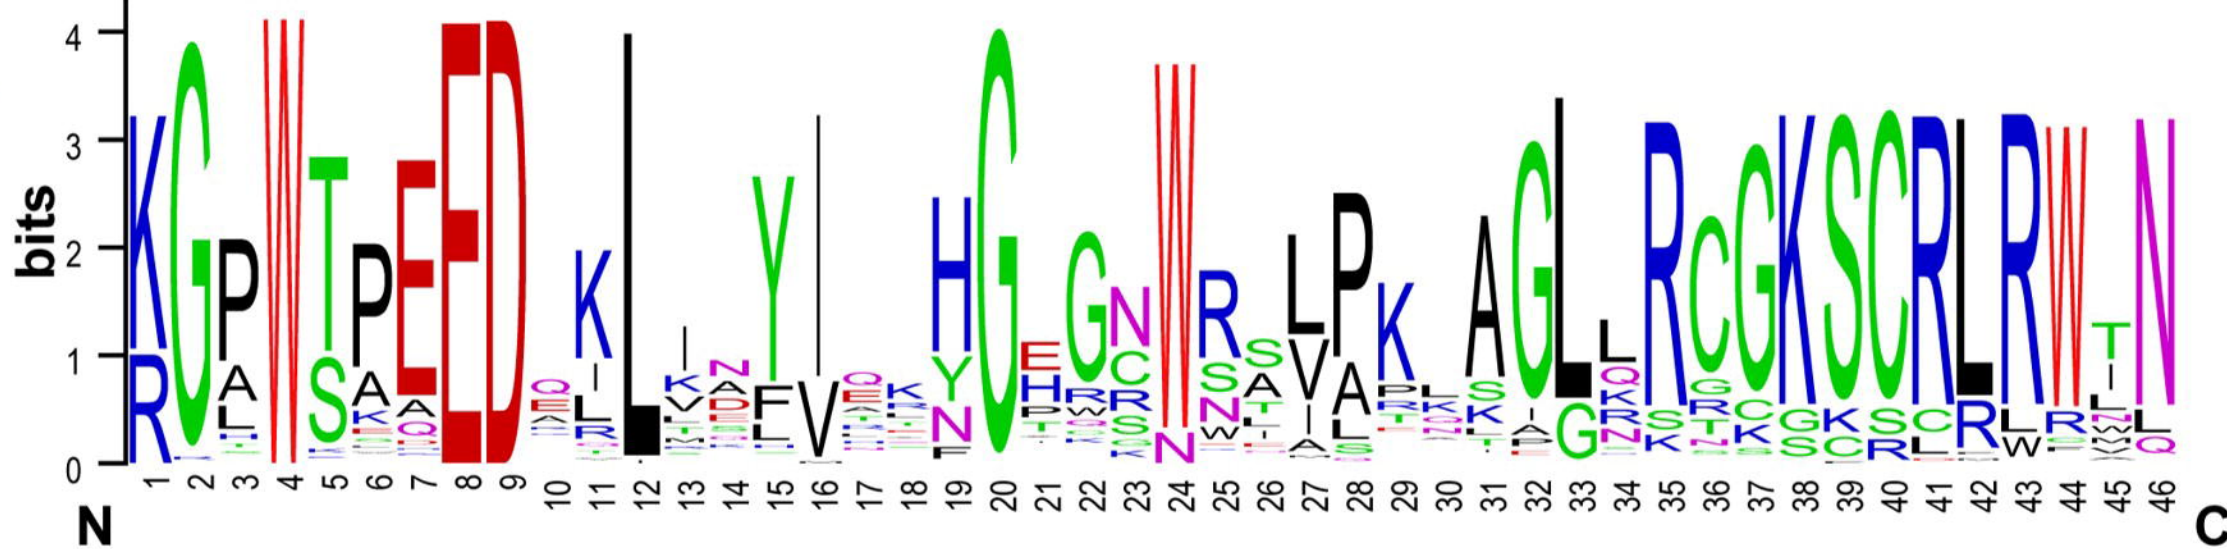**B**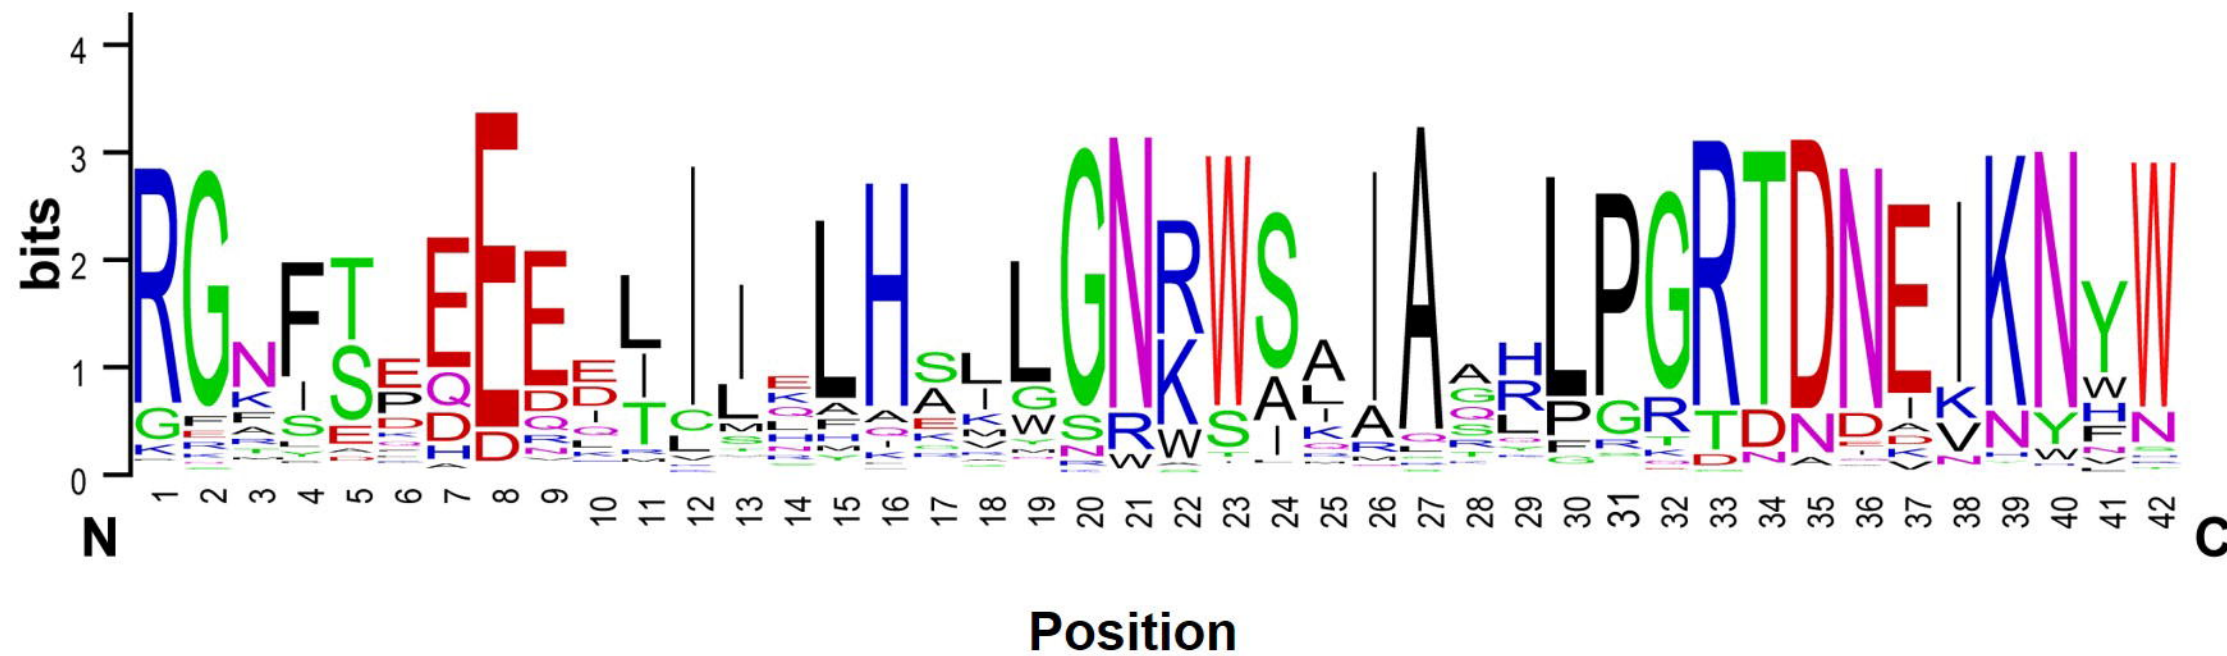

# R2R3-MYB Family

## Phylogenetic Tree

## Motif Pattern

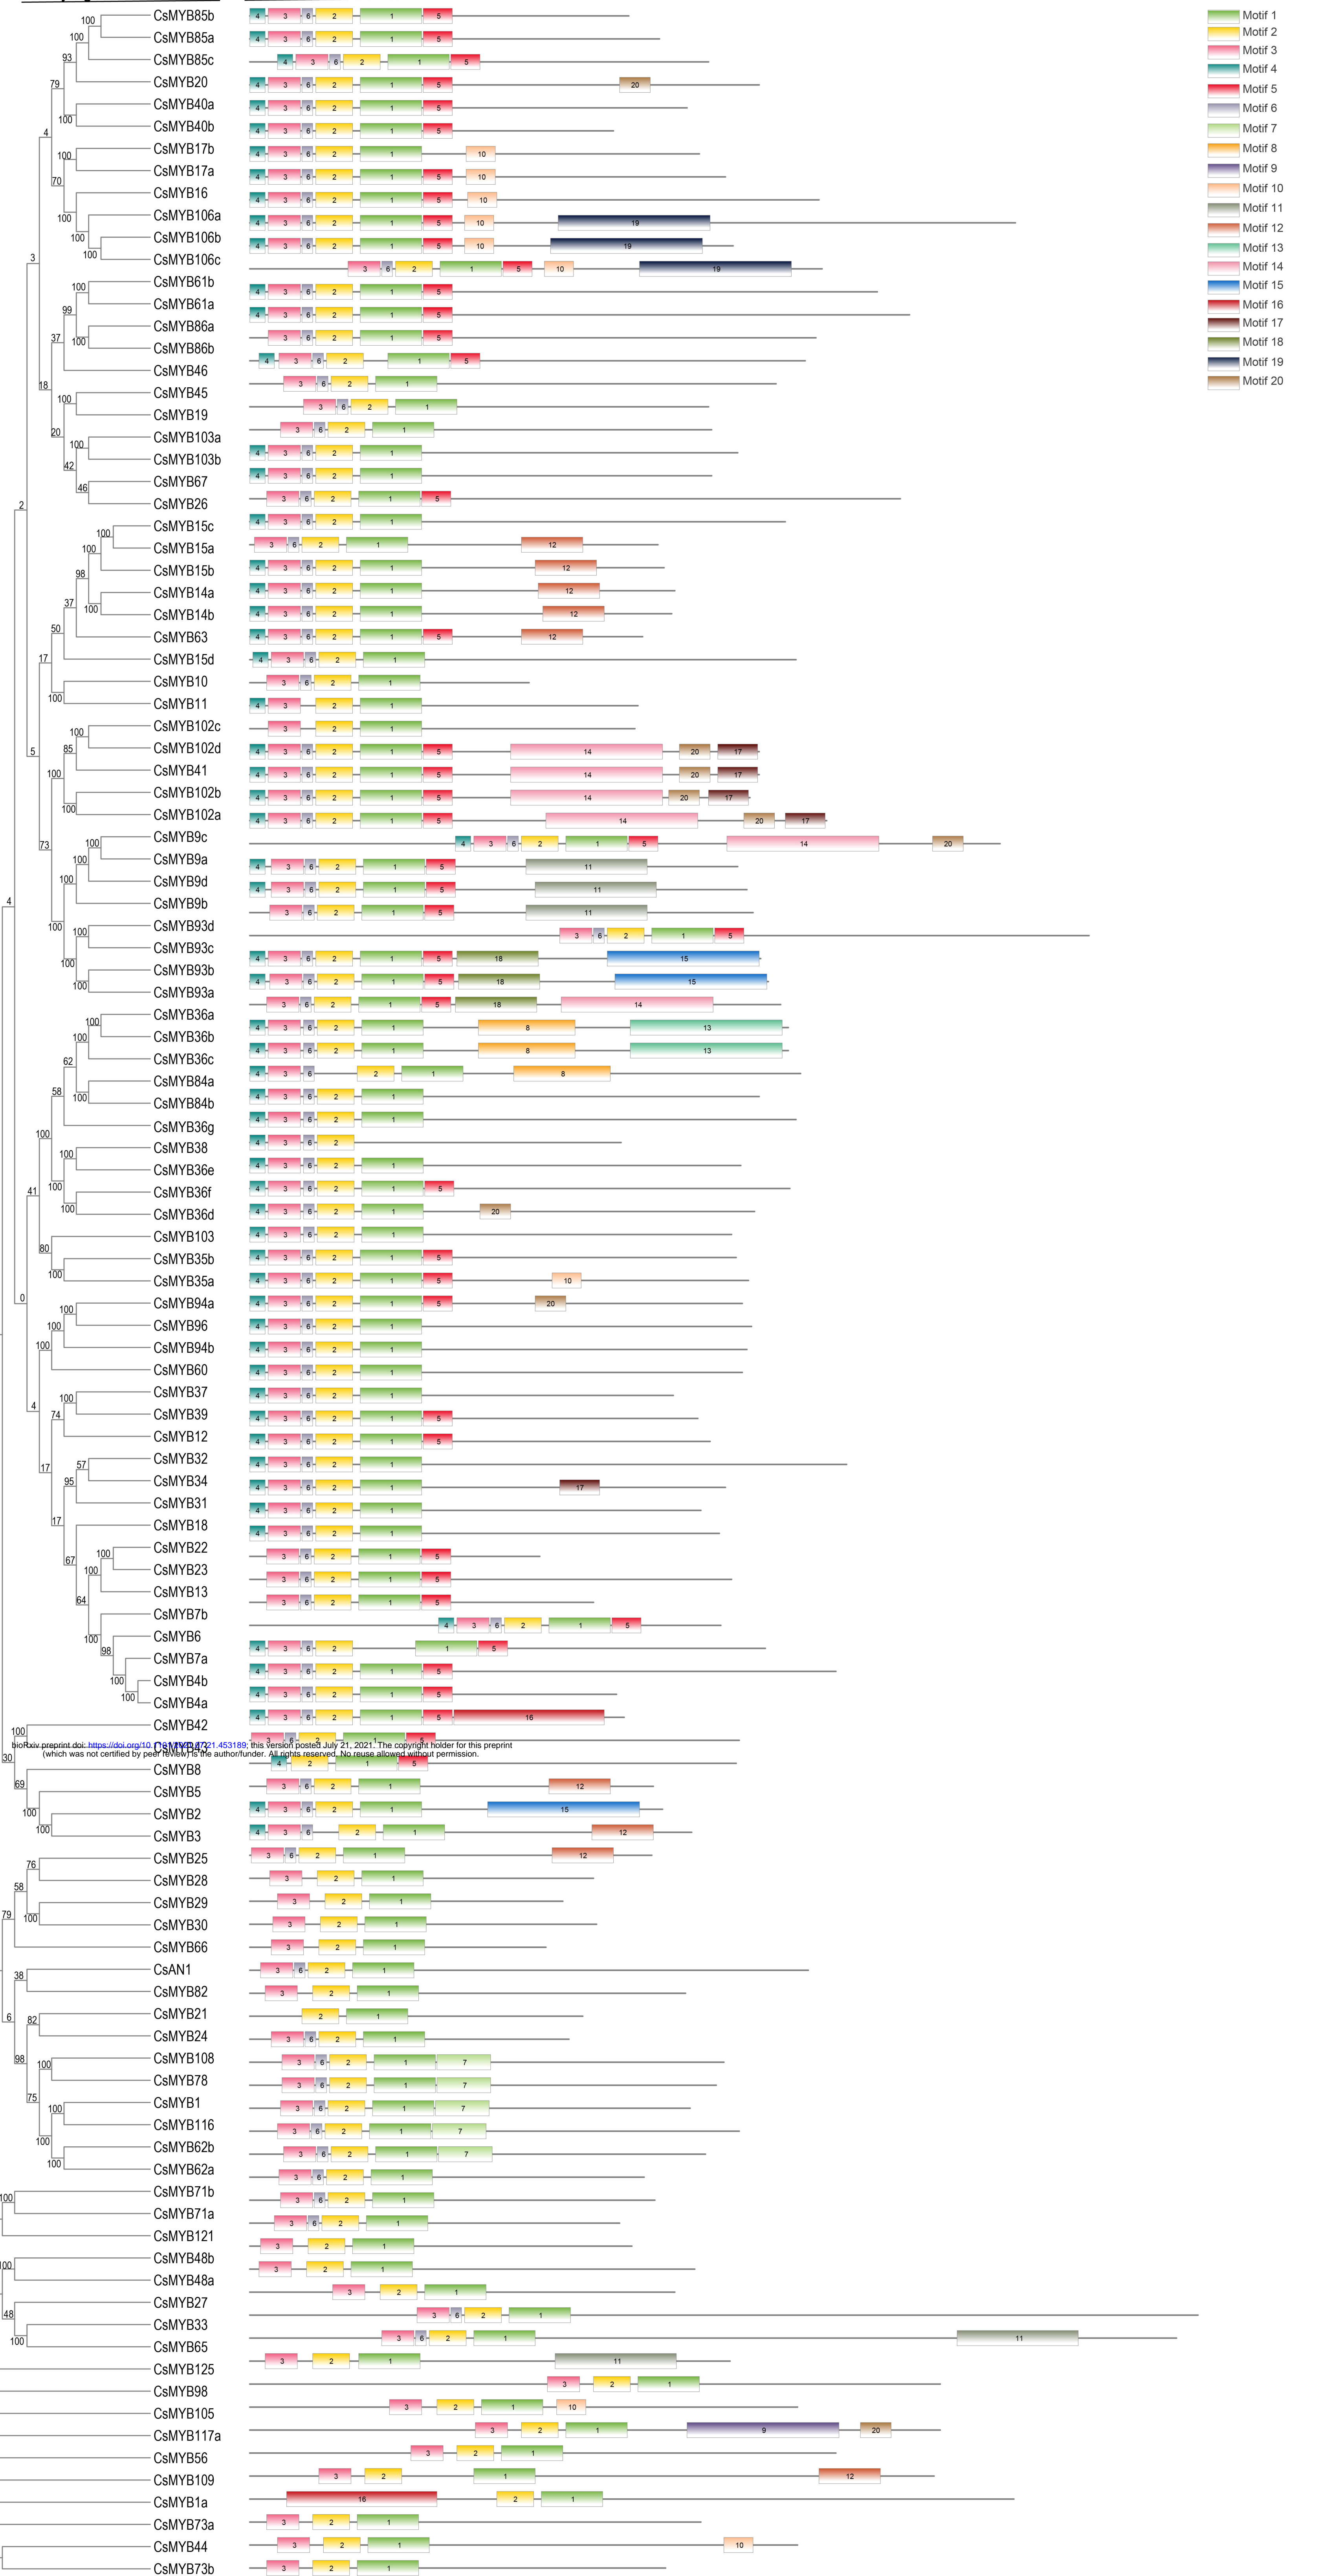

bioRxiv preprint doi: <https://doi.org/10.1101/2021.07.21.453189>; this version posted July 21, 2021. The copyright holder for this preprint (which was not certified by peer review) is the author/funder. All rights reserved. No reuse allowed without permission.

-3 -2 -1 0 1 2 3 **Log<sub>2</sub> FPKM (standardized)**

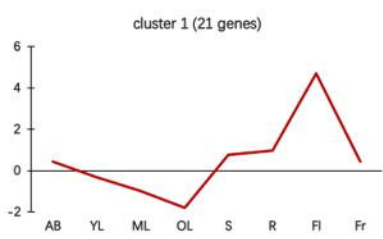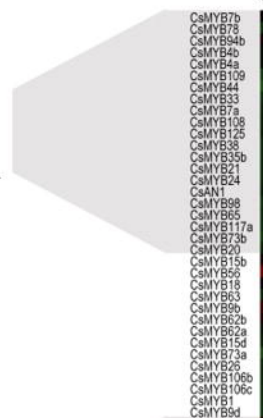

CaMYB7b  
CaMYB7f  
CaMYB94b  
CaMYB4b  
CaMYB4a  
CaMYB109  
CaMYB44  
CaMYB33  
CaMYB7a  
CaMYB108  
CaMYB125  
CaMYB36  
CaMYB35b  
CaMYB21  
CaMYB24  
CaAN1  
CaMYB98  
CaMYB65  
CaMYB117a  
CaMYB73b  
CaMYB20  
CaMYB15b  
CaMYB56  
CaMYB19  
CaMYB63  
CaMYB6b  
CaMYB52b  
CaMYB22a  
CaMYB15d  
CaMYB73a  
CaMYB25  
CaMYB108b  
CaMYB106c  
CaMYB1  
CaMYB8d  
CaMYB67  
CaMYB36b  
CaMYB48b  
CaMYB46a  
CaMYB14a  
CaMYB71a  
CaMYB36c  
CaMYB45  
CaMYB71b  
CaMYB121  
CaMYB7  
CaMYB36a  
CaMYB19  
CaMYB40a  
CaMYB5c  
CaMYB9a  
CaMYB3  
CaMYB36d  
CaMYB10  
CaMYB102c  
CaMYB8  
CaMYB5  
CaMYB40b  
CaMYB93b  
CaMYB36e  
CaMYB36c  
CaMYB11  
CaMYB36d  
CaMYB102d  
CaMYB35a  
CaMYB27  
CaMYB8  
CaMYB12  
CaMYB36g  
CaMYB15c  
CaMYB14b  
CaMYB15a  
CaMYB31  
CaMYB42  
CaMYB34  
CaMYB66  
CaMYB30  
CaMYB29  
CaMYB17a  
CaMYB39  
CaMYB102a  
CaMYB17b  
CaMYB6  
CaMYB94a  
CaMYB103  
CaMYB32  
CaMYB16  
CaMYB61b  
CaMYB37  
CaMYB22  
CaMYB65b  
CaMYB65a  
CaMYB63a  
CaMYB64d  
CaMYB36f  
CaMYB103b  
CaMYB102b  
CaMYB25  
CaMYB82  
CaMYB61a  
CaMYB116  
CaMYB66a  
CaMYB46  
CaMYB103a  
CaMYB84a  
CaMYB105  
CaMYB41  
CaMYB66b  
CaMYB106a  
CaMYB28  
CaMYB65c  
CaMYB11  
CaMYB23  
CaMYB43  
CaMYB60  
CaMYB13

S4&MYB6,MYB8  
S20  
S4&MYB6,MYB8  
S4&MYB6,MYB8  
S52  
S18  
S18&MYB6,MYB8  
S20  
SMYB125  
S14  
SMYB35&MYB103  
S19&S7  
S36  
S25&MYB98  
S18  
S21&MYB89  
SMYB20,MYB40,MYB42,MYB43,MYB85&MYB99  
S2  
S21&MYB89  
TPSB  
S3&MYB10,MYB72  
S10&S24  
S20  
S22  
SMYB26,MYB67&MYB103  
S9a  
S9a  
S20  
S10&S24  
SMYB26,MYB67&MYB103  
S14  
SMYB27,MYB48&MYB59  
SMYB27,MYB48&MYB59  
S2  
SMYB71,MYB79&MYB121  
S14  
S22  
SMYB71,MYB79&MYB121  
TPSA  
S14  
S16  
SMYB20,MYB40,MYB42,MYB43,MYB85&MYB99  
S10&S24  
S10&S24  
S14  
S10&S24  
TPSA  
S11&MYB49  
TPSA  
TPSA  
SMYB20,MYB40,MYB42,MYB43,MYB85&MYB99  
S10&S24  
S14  
S10&S24  
TPSA  
S14  
S14  
SMYB35&MYB103  
SMYB27,MYB48&MYB59  
S4&MYB6,MYB8  
S14

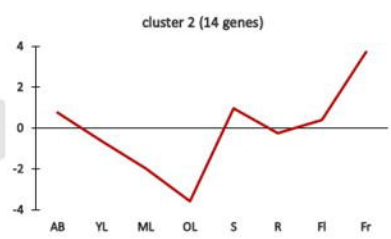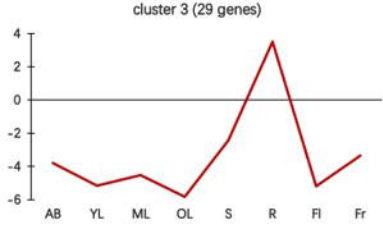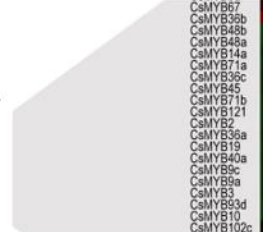

CaMYB8d  
CaMYB67  
CaMYB36b  
CaMYB48b  
CaMYB46a  
CaMYB14a  
CaMYB71a  
CaMYB36c  
CaMYB45  
CaMYB71b  
CaMYB121  
CaMYB7  
CaMYB36a  
CaMYB19  
CaMYB40a  
CaMYB5c  
CaMYB9a  
CaMYB3  
CaMYB36d  
CaMYB10  
CaMYB102c  
CaMYB8  
CaMYB5  
CaMYB40b  
CaMYB93b  
CaMYB36e  
CaMYB36c  
CaMYB11  
CaMYB36d  
CaMYB102d  
CaMYB35a  
CaMYB27  
CaMYB8  
CaMYB12  
CaMYB36g  
CaMYB15c  
CaMYB14b  
CaMYB15a  
CaMYB31  
CaMYB42  
CaMYB34  
CaMYB66  
CaMYB30  
CaMYB29  
CaMYB17a  
CaMYB39  
CaMYB102a  
CaMYB17b  
CaMYB6  
CaMYB94a  
CaMYB103  
CaMYB32  
CaMYB16  
CaMYB61b  
CaMYB37  
CaMYB22  
CaMYB65b  
CaMYB65a  
CaMYB63a  
CaMYB64d  
CaMYB36f  
CaMYB103b  
CaMYB102b  
CaMYB25  
CaMYB82  
CaMYB61a  
CaMYB116  
CaMYB66a  
CaMYB46  
CaMYB103a  
CaMYB84a  
CaMYB105  
CaMYB41  
CaMYB66b  
CaMYB106a  
CaMYB28  
CaMYB65c  
CaMYB11  
CaMYB23  
CaMYB43  
CaMYB60  
CaMYB13

S4&MYB6,MYB8  
S20  
S4&MYB6,MYB8  
S4&MYB6,MYB8  
S52  
S18  
S18&MYB6,MYB8  
S20  
SMYB125  
S14  
SMYB35&MYB103  
S19&S7  
S36  
S25&MYB98  
S18  
S21&MYB89  
SMYB20,MYB40,MYB42,MYB43,MYB85&MYB99  
S2  
S21&MYB89  
TPSB  
S3&MYB10,MYB72  
S10&S24  
S20  
S22  
SMYB26,MYB67&MYB103  
S9a  
S9a  
S20  
S10&S24  
SMYB26,MYB67&MYB103  
S14  
SMYB27,MYB48&MYB59  
SMYB27,MYB48&MYB59  
S2  
SMYB71,MYB79&MYB121  
S14  
S22  
SMYB71,MYB79&MYB121  
TPSA  
S14  
S16  
SMYB20,MYB40,MYB42,MYB43,MYB85&MYB99  
S10&S24  
S10&S24  
S14  
S10&S24  
TPSA  
S11&MYB49  
TPSA  
TPSA  
SMYB20,MYB40,MYB42,MYB43,MYB85&MYB99  
S10&S24  
S14  
S10&S24  
TPSA  
S14  
S14  
SMYB35&MYB103  
SMYB27,MYB48&MYB59  
S4&MYB6,MYB8  
S14

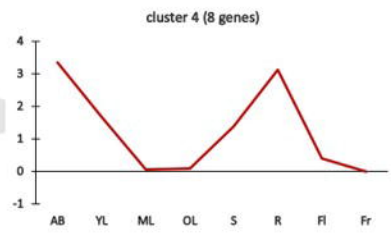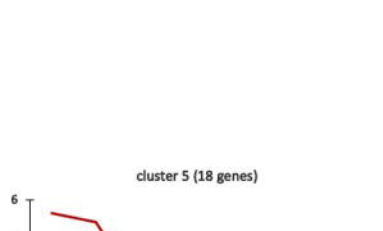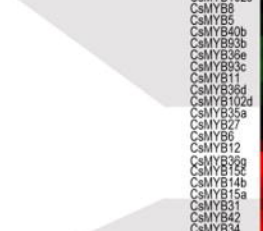

CaMYB8d  
CaMYB67  
CaMYB36b  
CaMYB48b  
CaMYB46a  
CaMYB14a  
CaMYB71a  
CaMYB36c  
CaMYB45  
CaMYB71b  
CaMYB121  
CaMYB7  
CaMYB36a  
CaMYB19  
CaMYB40a  
CaMYB5c  
CaMYB9a  
CaMYB3  
CaMYB36d  
CaMYB10  
CaMYB102c  
CaMYB8  
CaMYB5  
CaMYB40b  
CaMYB93b  
CaMYB36e  
CaMYB36c  
CaMYB11  
CaMYB36d  
CaMYB102d  
CaMYB35a  
CaMYB27  
CaMYB8  
CaMYB12  
CaMYB36g  
CaMYB15c  
CaMYB14b  
CaMYB15a  
CaMYB31  
CaMYB42  
CaMYB34  
CaMYB66  
CaMYB30  
CaMYB29  
CaMYB17a  
CaMYB39  
CaMYB102a  
CaMYB17b  
CaMYB6  
CaMYB94a  
CaMYB103  
CaMYB32  
CaMYB16  
CaMYB61b  
CaMYB37  
CaMYB22  
CaMYB65b  
CaMYB65a  
CaMYB63a  
CaMYB64d  
CaMYB36f  
CaMYB103b  
CaMYB102b  
CaMYB25  
CaMYB82  
CaMYB61a  
CaMYB116  
CaMYB66a  
CaMYB46  
CaMYB103a  
CaMYB84a  
CaMYB105  
CaMYB41  
CaMYB66b  
CaMYB106a  
CaMYB28  
CaMYB65c  
CaMYB11  
CaMYB23  
CaMYB43  
CaMYB60  
CaMYB13

S4&MYB6,MYB8  
S20  
S4&MYB6,MYB8  
S4&MYB6,MYB8  
S52  
S18  
S18&MYB6,MYB8  
S20  
SMYB125  
S14  
SMYB35&MYB103  
S19&S7  
S36  
S25&MYB98  
S18  
S21&MYB89  
SMYB20,MYB40,MYB42,MYB43,MYB85&MYB99  
S2  
S21&MYB89  
TPSB  
S3&MYB10,MYB72  
S10&S24  
S20  
S22  
SMYB26,MYB67&MYB103  
S9a  
S9a  
S20  
S10&S24  
SMYB26,MYB67&MYB103  
S14  
SMYB27,MYB48&MYB59  
SMYB27,MYB48&MYB59  
S2  
SMYB71,MYB79&MYB121  
S14  
S22  
SMYB71,MYB79&MYB121  
TPSA  
S14  
S16  
SMYB20,MYB40,MYB42,MYB43,MYB85&MYB99  
S10&S24  
S10&S24  
S14  
S10&S24  
TPSA  
S11&MYB49  
TPSA  
TPSA  
SMYB20,MYB40,MYB42,MYB43,MYB85&MYB99  
S10&S24  
S14  
S10&S24  
TPSA  
S14  
S14  
SMYB35&MYB103  
SMYB27,MYB48&MYB59  
S4&MYB6,MYB8  
S14

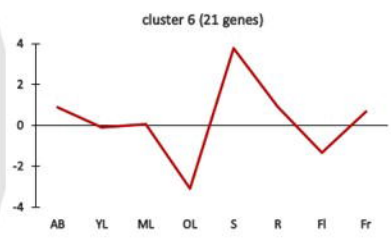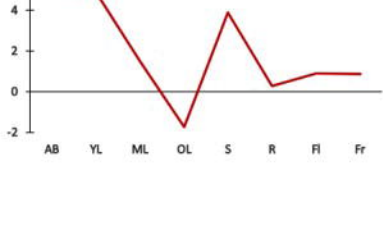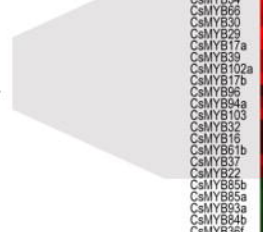

CaMYB8d  
CaMYB67  
CaMYB36b  
CaMYB48b  
CaMYB46a  
CaMYB14a  
CaMYB71a  
CaMYB36c  
CaMYB45  
CaMYB71b  
CaMYB121  
CaMYB7  
CaMYB36a  
CaMYB19  
CaMYB40a  
CaMYB5c  
CaMYB9a  
CaMYB3  
CaMYB36d  
CaMYB10  
CaMYB102c  
CaMYB8  
CaMYB5  
CaMYB40b  
CaMYB93b  
CaMYB36e  
CaMYB36c  
CaMYB11  
CaMYB36d  
CaMYB102d  
CaMYB35a  
CaMYB27  
CaMYB8  
CaMYB12  
CaMYB36g  
CaMYB15c  
CaMYB14b  
CaMYB15a  
CaMYB31  
CaMYB42  
CaMYB34  
CaMYB66  
CaMYB30  
CaMYB29  
CaMYB17a  
CaMYB39  
CaMYB102a  
CaMYB17b  
CaMYB6  
CaMYB94a  
CaMYB103  
CaMYB32  
CaMYB16  
CaMYB61b  
CaMYB37  
CaMYB22  
CaMYB65b  
CaMYB65a  
CaMYB63a  
CaMYB64d  
CaMYB36f  
CaMYB103b  
CaMYB102b  
CaMYB25  
CaMYB82  
CaMYB61a  
CaMYB116  
CaMYB66a  
CaMYB46  
CaMYB103a  
CaMYB84a  
CaMYB105  
CaMYB41  
CaMYB66b  
CaMYB106a  
CaMYB28  
CaMYB65c  
CaMYB11  
CaMYB23  
CaMYB43  
CaMYB60  
CaMYB13

S4&MYB6,MYB8  
S20  
S4&MYB6,MYB8  
S4&MYB6,MYB8  
S52  
S18  
S18&MYB6,MYB8  
S20  
SMYB125  
S14  
SMYB35&MYB103  
S19&S7  
S36  
S25&MYB98  
S18  
S21&MYB89  
SMYB20,MYB40,MYB42,MYB43,MYB85&MYB99  
S2  
S21&MYB89  
TPSB  
S3&MYB10,MYB72  
S10&S24  
S20  
S22  
SMYB26,MYB67&MYB103  
S9a  
S9a  
S20  
S10&S24  
SMYB26,MYB67&MYB103  
S14  
SMYB27,MYB48&MYB59  
SMYB27,MYB48&MYB59  
S2  
SMYB71,MYB79&MYB121  
S14  
S22  
SMYB71,MYB79&MYB121  
TPSA  
S14  
S16  
SMYB20,MYB40,MYB42,MYB43,MYB85&MYB99  
S10&S24  
S10&S24  
S14  
S10&S24  
TPSA  
S11&MYB49  
TPSA  
TPSA  
SMYB20,MYB40,MYB42,MYB43,MYB85&MYB99  
S10&S24  
S14  
S10&S24  
TPSA  
S14  
S14  
SMYB35&MYB103  
SMYB27,MYB48&MYB59  
S4&MYB6,MYB8  
S14

AB YL ML OL S R FI Fr

AB YL ML OL S R FI Fr

AB YL ML OL S R FI Fr



**A**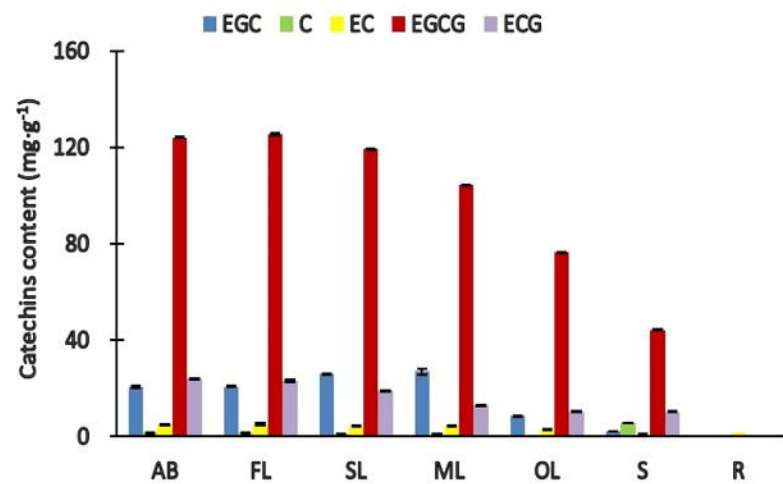**B**

Transcript abundance ratio ( $\log_2$ )

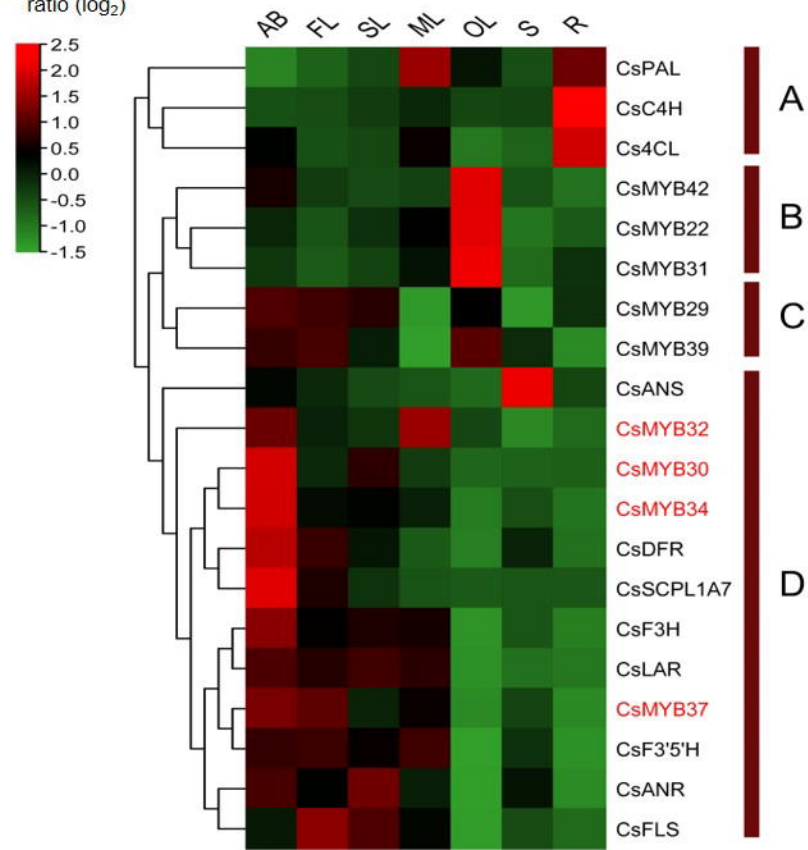**C**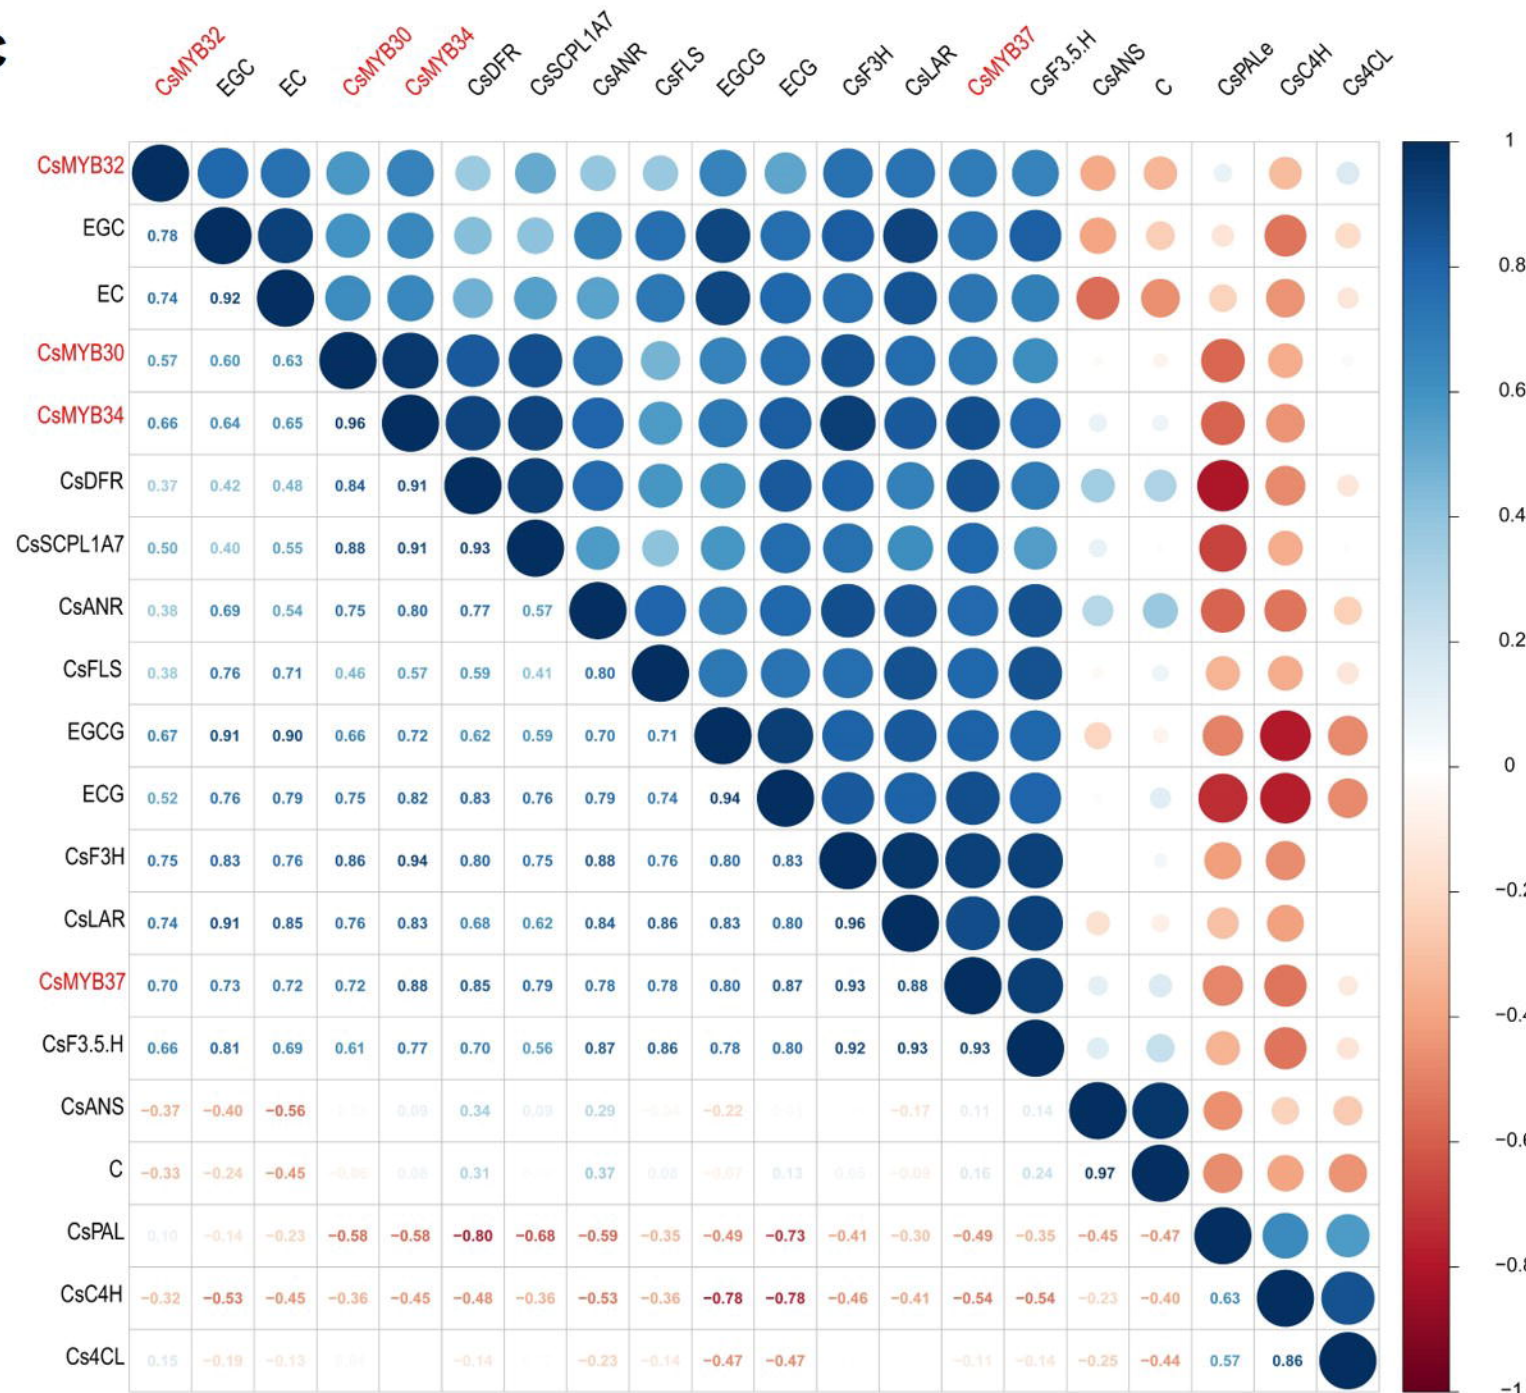

Source: https://www.biorxiv.org/content/10.1101/2021.07.21.453189v1.full.pdf
